# Supplementary material for: A new method for the construction of the hydroxylated tropane skeleton: enantioselective synthesis of (−)-Bao Gong Teng A
Source: Royal Society of Chemistry journal article supplement (doi:10.1039/c0cc04371k), 2010-11-25

## SUPPORTING INFORMATION

### **A New Method for the Construction of the Hydroxylated Tropane Skeleton: Enantioselective Synthesis of (–)-Bao Gong Teng A**

Geng-Jie Lin, Xiao Zheng, Pei-Qiang Huang\*  
Department of Chemistry and Key Laboratory for Chemical Biology of Fujian  
Province, College of Chemistry and Chemical Engineering, Xiamen University,  
Xiamen, Fujian 361005, P. R. China

#### Contents

|                                |                |
|--------------------------------|----------------|
| <b>General Methods</b>         | <b>S2</b>      |
| <b>Experimental Procedures</b> | <b>S2-S12</b>  |
| <b>References</b>              | <b>S12</b>     |
| <b>NMR Spectra</b>             | <b>S13-S38</b> |

## General Methods

Melting points were determined on a Yanaco MP-500 melting point apparatus and are uncorrected. Optical rotations were recorded on a Perkin-Elmer 341 automatic polarimeter. IR spectra were recorded on a Nicolet Avatar 360 FT-IR spectrophotometer.  $^1\text{H}$  NMR and  $^{13}\text{C}$  NMR spectra were recorded on a Varian unity +500 NMR spectrometer or a Bruker AV 400 NMR spectrometer. Unless otherwise noted,  $^1\text{H}$  NMR spectra were registered in  $\text{CDCl}_3$ , and chemical shifts are expressed in parts per million ( $\delta$ ) relative to internal  $\text{Me}_4\text{Si}$ . Mass spectra were recorded by Bruker Dalton Esquire 3000 plus and Finnigan Mat-LCQ (ESI direct injection). HRMS spectra were recorded on a Shimadzu LCMS-IT-TOF apparatus. Elemental analyses were performed using a Vario RL analyzer. Tetrahydrofuran was distilled prior to use from sodium benzophenone ketyl. Methylene dichloride was distilled from phosphorus pentoxide. Silica gel (zhifu, 300-400 mesh) from Yantai silica gel factory (China) was used for column chromatography, eluting (unless otherwise stated) with ethyl acetate/ petroleum ether (PE) (60-90 °C) mixture.

## Experimental Procedures

### (*S*)-1-Allyl-3-(benzyloxy)pyrrolidine-2,5-dione (**6**).

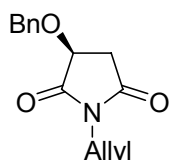

To a suspension of (*S*)-1-allyl-3-(benzyloxy)pyrrolidine-2,5-dione<sup>1</sup> (8.80 g, 56.8 mmol) and  $\text{Ag}_2\text{O}$  (39.7 g, 171 mmol) in  $\text{Et}_2\text{O}$  (114 mL) was added  $\text{BnBr}$  (20.5 mL, 171 mmol). After stirring at dark for two days at room temperature, the mixture was filtered through celite and the residue concentrated in vacuo. Purification of the residue by flash chromatography on silica gel ( $\text{CH}_2\text{Cl}_2$ : PE = 3: 1) afforded compound **6** (13.1 g, 53.4 mmol, 94%) as a colorless oil.  $[\alpha]_{\text{D}}^{17} -100.9$  ( $c$  1.60,  $\text{CHCl}_3$ ); IR (film): 3083, 3058, 3031, 2979, 2932, 2868, 1784, 1712, 1644, 1497, 1455, 1429, 1396, 1333, 1289, 1253, 1196, 1124  $\text{cm}^{-1}$ ;  $^1\text{H}$ -NMR (400 MHz,  $\text{CDCl}_3$ )  $\delta$  2.67 (dd,  $J = 4.1, 18.3$  Hz, 1H, H-4), 2.96 (dd,  $J = 8.2, 18.3$  Hz, 1H, H-4), 4.09-4.12 (m, 2H,  $\text{NCH}_2$ ), 4.37 (dd,  $J = 4.1, 8.2$  Hz, 1H, H-3), 4.78 (d,  $J = 11.7$  Hz, 1H,  $\text{OCH}_2\text{Ph}$ ), 4.99 (d,  $J = 11.7$  Hz, 1H,  $\text{OCH}_2\text{Ph}$ ), 5.17-5.26 (m, 2H,  $\text{CH}=\text{CH}_2$ ), 5.72-5.83 (m, 1H,

$CH=CH_2$ ), 7.29-7.41 (m, 5H, ArH);  $^{13}C$ -NMR (100 MHz,  $CDCl_3$ )  $\delta$  36.2, 40.6, 72.0, 72.9, 118.5, 128.1, 128.2, 128.5, 130.3, 136.6, 173.6, 175.4; MS (ESI)  $m/z$  268 ( $M+Na^+$ , 100%); Anal. calcd for  $C_{14}H_{15}NO_3$ : C, 68.56; H, 6.16; N, 5.71. Found: C, 68.33; H, 6.14; N, 5.70.

**(4*S*,5*R*)-1-Allyl-4-(benzyloxy)-5-(3-hydroxypropyl)pyrrolidin-2-one (8).**

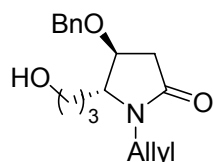

To a cooled solution (0 °C) of compound **6** (1.96 g, 8.00 mmol) in  $CH_2Cl_2$  (64 mL) was added a 0.5 M solution of Grignard reagent **7** in THF (64 mL, 32.0 mmol), prepared from 3-*tert*-butyldimethylsilyloxypropyl bromide. After stirring at 0 °C for 8 h, the reaction was quenched with  $H_2O$  (20 mL). The aqueous phase was extracted with  $CH_2Cl_2$  (4×60 mL). The combined organic layers were washed with brine and dried over anhydrous  $Na_2SO_4$ . After filtration and concentration in vacuo, the residue was purified by flash chromatography on silica gel (EtOAc: PE = 1: 2) to afford the adduct (*N,O*-acetal) as a diastereomeric mixture in a combined yield of 94%, which, without further separation, was used in the next step.

To a cooled solution (−55 °C) of the diastereomeric mixture of *N,O*-acetals in  $CH_2Cl_2$  (50 mL) were added successively  $Et_3SiH$  (16.8 mL, 110 mmol) and  $BF_3 \cdot OEt_2$  (5.2 mL, 44.2 mmol). After stirring at −55 °C for overnight, the mixture was allowed to slowly warm to room temperature and stirred for another 2 days. Saturated aqueous  $NaHCO_3$  (20 mL) was added and the aqueous phase was extracted with  $CH_2Cl_2$  (4×30 mL). The combined organic layers were washed with brine, dried over anhydrous  $Na_2SO_4$ , and filtered. After concentration in vacuo, the residue was purified by flash chromatography on silica gel (EtOAc: PE = 2: 1) to afford compound **8** (1.88 g, 6.51 mmol, 82%) as a colorless oil.  $[\alpha]_D^{17} +50.5$  ( $c$  0.97,  $CHCl_3$ ); IR (film): 3408, 3083, 3063, 3030, 2927, 2867, 1674, 1636, 1496, 1454, 1413, 1359, 1264, 1196, 1067  $cm^{-1}$ ;  $^1H$ -NMR (400 MHz,  $CDCl_3$ )  $\delta$  1.35-1.60 (m, 3H), 1.70-1.80 (m, 1H), 1.90-2.20 (br s, 1H, OH,  $D_2O$  exchangeable), 2.49 (dd,  $J$  = 2.0, 17.5 Hz, 1H, H-3), 2.68 (dd,  $J$  = 6.6, 17.5 Hz, 1H, H-3), 3.48 (dd,  $J$  = 7.0, 15.8 Hz, 1H,  $CH_2N$ ), 3.62 (t,  $J$  = 6.3 Hz, 2H,  $CH_2OH$ ), 3.65 (ddd,  $J$  = 2.0, 3.4, 7.1 Hz, 1H, H-5), 3.90 (ddd,  $J$  = 2.0, 2.0, 6.6 Hz, 1H, H-4), 4.35 (dd,  $J$  = 4.3, 15.8 Hz, 1H,  $CH_2N$ ), 4.48 (d,  $J$  = 11.8 Hz, 1H,  $OCH_2Ph$ ), 4.54

(d,  $J = 11.8$  Hz, 1H,  $\text{OCH}_2\text{Ph}$ ), 5.15-5.28 (m, 2H,  $\text{CH}=\text{CH}_2$ ), 5.67-5.79 (m, 1H,  $\text{CH}=\text{CH}_2$ ), 7.28-7.38 (m, 5H, ArH);  $^{13}\text{C}$  NMR (100 MHz,  $\text{CDCl}_3$ )  $\delta$  27.2, 27.8, 37.2, 42.9, 62.2, 63.6, 70.7, 75.8, 117.8, 127.7, 127.9, 128.5, 132.3, 137.5, 172.3; MS (ESI)  $m/z$  312 ( $\text{M}+\text{Na}^+$ , 100%); Anal. calcd for  $\text{C}_{17}\text{H}_{23}\text{NO}_3$ : C, 70.56; H, 8.01; N, 4.84. Found: C, 70.50; H, 8.03; N, 4.84.

**(4*S*,5*R*)-4-(Benzyloxy)-5-(3-hydroxypropyl)pyrrolidin-2-one (9).**

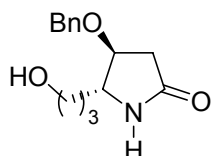

A mixture of compound **8** (1.92 g, 6.64 mmol) and  $\text{RhCl}_3 \cdot x\text{H}_2\text{O}$  (107 mg) in EtOH (65 mL) was refluxed for 6 hours. After removal of the solvent, the residue was dissolved in  $\text{H}_2\text{O}/\text{AcOH}$  (45 mL /45 mL) and refluxed for another 48 hours. Water and the acetic acid were removed under reduced pressure. To the resulting residue in 40 mL EtOH (40 mL) was added AcCl (1.1 mL, 15.5 mmol) at 0 °C under nitrogen atmosphere. After stirring at room temperature for one day, the reaction mixture was concentrated and the residue was dissolved in  $\text{CH}_2\text{Cl}_2$  (100 mL). The organic phase was washed successively with saturated aqueous  $\text{NaHCO}_3$  and brine, dried over  $\text{Na}_2\text{SO}_4$ . After filtration and concentration in vacuo, the residue was purified by flash chromatography on silica gel (EtOAc: MeOH = 20: 1) to afford compound **9** (1.24 g, 4.98 mmol, 75%) as a colorless oil.  $[\alpha]_{\text{D}}^{17} +59.8$  ( $c$  1.85,  $\text{CHCl}_3$ ); IR (film): 3272, 3088, 3054, 3025, 2935, 2868, 1693, 1497, 1454, 1393, 1354, 1310, 1267, 1067, 1029  $\text{cm}^{-1}$ ;  $^1\text{H}$ -NMR (400 MHz,  $\text{CDCl}_3$ )  $\delta$  1.44-1.54 (m, 1H), 1.54-1.69 (m, 3H), 2.39 (dd,  $J = 3.9, 17.4$  Hz, 1H, H-3), 2.62 (dd,  $J = 6.9, 17.4$  Hz, 1H, H-3), 3.48 (br s, 1H, OH), 3.54-3.68 (m, 3H,  $\text{CH}_2\text{OH}$  and H-5), 3.86 (ddd,  $J = 3.6, 3.9, 6.9$  Hz, 1H, H-4), 4.46 (d,  $J = 11.7$  Hz, 1H,  $\text{OCH}_2\text{Ph}$ ), 4.52 (d,  $J = 11.7$  Hz, 1H,  $\text{OCH}_2\text{Ph}$ ), 7.25-7.37 (m, 5H, ArH), 7.62 (brs, 1H, NH);  $^{13}\text{C}$  NMR (100 MHz,  $\text{CDCl}_3$ )  $\delta$  28.7, 31.2, 37.1, 60.7, 61.7, 71.1, 79.0, 127.6, 127.8, 128.4, 137.3, 175.8; MS (ESI)  $m/z$  272 ( $\text{M}+\text{Na}^+$ , 100%); Anal. calcd for  $\text{C}_{14}\text{H}_{19}\text{NO}_3$ : C, 67.45; H, 7.68; N, 5.62. Found: C, 67.57; H, 7.66; N, 5.63.

**(4*S*,5*R*)-4-(Benzyloxy)-5-(3-*tert*-butyldimethylsilyloxypropyl)pyrrolidin-2-one (10).**

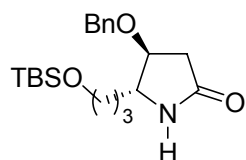

A mixture of hydroxy-lactam **9** (1.40 g, 5.62 mmol), imidazole (444 mg, 16.9 mmol), TBSCl (1.70 g, 11.3 mmol) and DMAP (50 mg) in anhydrous  $\text{CH}_2\text{Cl}_2$  (8 mL) was stirred at room temperature under nitrogen atmosphere for 24 hours. After quenching with water (15 mL) at 0 °C, the aqueous phase was extracted with  $\text{CH}_2\text{Cl}_2$  (3×40 mL). The combined organic phases were washed successively with a saturated aqueous solution of  $\text{NaHCO}_3$  and brine, dried over  $\text{Na}_2\text{SO}_4$ . After filtration and concentration in vacuo, the residue was purified by flash chromatography on silica gel (EtOAc: PE = 1: 5) to afford compound **10** (1.73 g, 4.77 mmol, yield: 85%) as a colorless oil.  $[\alpha]_D^{25} +29.3$  (*c* 1.20,  $\text{CHCl}_3$ ); IR (film): 3211, 3091, 3032, 2951, 2928, 2885, 2857, 1702, 1497, 1472, 1455, 1388, 1359, 1308, 1256, 1167, 1205, 1098, 1029, 1006  $\text{cm}^{-1}$ ;  $^1\text{H-NMR}$  (400 MHz,  $\text{CDCl}_3$ )  $\delta$  0.22 (s, 6H,  $(\text{CH}_3)_2\text{Si}$ ), 1.06 (s, 9H, *t*-Bu), 1.65-1.90 (m, 4H,  $2\times\text{CH}_2$ ), 2.57 (dd, *J* = 3.8, 17.3 Hz, 1H, H-3), 2.79 (dd, *J* = 7.0, 17.3 Hz, 1H, H-3), 3.74-3.85 (m, 3H,  $\text{CH}_2\text{OTBS}$  and H-5), 4.05 (ddd, *J* = 3.6, 3.8, 7.0 Hz, 1H, H-4), 4.66 (d, *J* = 11.8 Hz, 1H,  $\text{OCH}_2\text{Ph}$ ), 4.71 (d, *J* = 11.8 Hz, 1H,  $\text{OCH}_2\text{Ph}$ ), 7.43-7.54 (m, 5H, ArH);  $^{13}\text{C NMR}$  (100 MHz,  $\text{CDCl}_3$ )  $\delta$  -5.4 (2C), 18.2, 25.9, 29.0, 31.4, 37.1, 60.6, 62.5, 71.1, 79.0, 127.6, 127.8, 128.4, 137.5, 175.4; MS (ESI) *m/z* 386 ( $\text{M}+\text{Na}^+$ , 100%); Anal. calcd for  $\text{C}_{20}\text{H}_{33}\text{NO}_3\text{Si}$ : C, 66.07; H, 9.15; N, 3.85. Found: C, 66.25; H, 9.13; N, 3.84.

***tert*-Butyl (2*R*,3*S*)-3-(benzyloxy)-2-(3-*tert*-butyldimethylsilyloxypropyl)-5-oxopyrrolidine-1-carboxylate (**11**).**

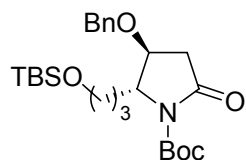

To a mixture of compound **10** (1.21 g, 3.33 mmol),  $\text{Et}_3\text{N}$  (1.4 mL, 10.1 mmol) and DMAP (50 mg, 0.38 mmol) in anhydrous  $\text{CH}_2\text{Cl}_2$  (6.7 mL) was added dropwise  $(\text{Boc})_2\text{O}$  (1.9 mL, 8.3 mmol) under nitrogen atmosphere at 0 °C. After stirring at room temperature for 24 hours, the reaction was quenched with water (20 mL) at 0 °C. The aqueous phase was extracted with  $\text{CH}_2\text{Cl}_2$  (3×30 mL). The combined organic layers were washed with brine (10 mL), dried over anhydrous  $\text{Na}_2\text{SO}_4$ . After filtration and

concentration in vacuo, the residue was purified by flash chromatography on silica gel (EtOAc: PE = 1: 7) to afford compound **11** (1.45 g, 3.13 mmol, 94%) as a colorless oil.  $[\alpha]_D^{25} -34.5$  ( $c$  1.39,  $\text{CHCl}_3$ ); IR (film): 3054, 3029, 2954, 2930, 2857, 1786, 1752, 1716, 1497, 1471, 1455, 1368, 1309, 1212, 1153, 1095, 1070, 1043, 1026  $\text{cm}^{-1}$ ;  $^1\text{H-NMR}$  (400 MHz,  $\text{CDCl}_3$ )  $\delta$  0.03 (s, 6H,  $2\times\text{SiCH}_3$ ), 0.88 (s, 9H,  $t\text{-BuSi}$ ), 1.37-1.60 (m, 3H), 1.53 (s, 9H,  $t\text{-BuO}$ ), 1.74-1.86 (m, 1H), 2.59 (d,  $J = 18.1$  Hz, 1H, H-3), 2.76 (dd,  $J = 5.6, 18.1$  Hz, 1H, H-3), 3.61 (t,  $J = 6.1$  Hz, 2H,  $\text{TBSOCH}_2$ ), 3.83 (d,  $J = 5.6$  Hz, 1H, H-4), 4.15 (dd,  $J = 3.5, 9.5$  Hz, 1H, H-5), 4.51 (d,  $J = 12.1$  Hz, 1H,  $\text{OCH}_2\text{Ph}$ ), 4.54 (d,  $J = 12.1$  Hz, 1H,  $\text{OCH}_2\text{Ph}$ ), 7.26-7.38 (m, 5H, ArH);  $^{13}\text{C NMR}$  (100 MHz,  $\text{CDCl}_3$ )  $\delta$  -5.4 (2C), 18.4, 26.1, 28.2, 28.9, 29.2, 38.5, 62.6, 64.4, 70.7, 74.2, 83.1, 127.8, 128.1, 128.7, 137.4, 149.9, 172.3; MS (ESI)  $m/z$  486 ( $\text{M}+\text{Na}^+$ , 100%); Anal. calcd for  $\text{C}_{25}\text{H}_{41}\text{NO}_5\text{Si}$ : C, 64.76; H, 8.91; N, 3.02. Found: C, 64.92; H, 8.93; N, 3.01.

***tert*-Butyl (2*R*,3*S*)-3-hydroxy-2-(3-*tert*-butyldimethylsilyloxypropyl)-5-oxopyrrolidine-1-carboxylate (**5**).**

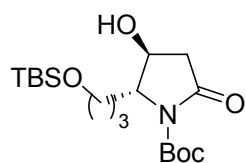

To a solution of compound **11** (1.449 g, 3.13 mmol) in 16 mL of ethanol was added 10% Pd/C (435 mg). The mixture was hydrogenated under 1 atm hydrogen pressure at room temperature for 36 h. The reaction mixture was filtered through celite and the filtrate was evaporated in vacuo. Flash chromatography (EtOAc: PE = 1: 2) of the residue afforded compound **5** (1.15 g, 3.09 mmol, 95%) as white crystals. M.p. = 96-97 °C (EtOAc/PE);  $[\alpha]_D^{20} -44.1$  ( $c$  1.36,  $\text{CHCl}_3$ ); IR (film) 3460, 2928, 2856, 1771, 1723, 1460, 1368, 1350, 1294, 1253, 1227, 1154, 1122, 1082, 1049, 1021  $\text{cm}^{-1}$ ;  $^1\text{H NMR}$  (400 MHz,  $\text{CDCl}_3$ )  $\delta$  0.01 (s, 6H,  $2\times\text{SiCH}_3$ ), 0.85 (s, 9H,  $t\text{-BuSi}$ ), 1.36-1.47 (m, 1H), 1.49 (s, 9H,  $Ot\text{-Bu}$ ), 1.51-1.62 (m, 2H), 1.69-1.82 (m, 1H), 2.43 (d,  $J = 18.1$  Hz, 1H, H-3), 2.78 (dd,  $J = 5.4, 18.1$  Hz, 1H, H-3), 3.17 (d,  $J = 3.4$  Hz, 1H,  $\text{D}_2\text{O}$  exchangeable, OH), 3.61 (t,  $J = 6.0$  Hz, 2H,  $\text{CH}_2\text{OTBS}$ ), 4.00 (dd,  $J = 3.5, 9.6$  Hz, 1H, H-5), 4.14 (dd,  $J = 3.4, 5.4$  Hz, 1H, H-4);  $^{13}\text{C NMR}$  (100 MHz,  $\text{CDCl}_3$ )  $\delta$  -5.2 (2C), 18.5, 26.1, 28.2, 28.9, 29.3, 41.3, 62.8, 67.6, 67.7, 83.2, 150.1, 173.2; MS (ESI)  $m/z$  396 ( $\text{M}+\text{Na}^+$ , 100%); Anal. calcd for  $\text{C}_{18}\text{H}_{35}\text{NO}_5\text{Si}$ : C, 57.87; H, 9.44; N, 3.75. Found: C, 57.92; H, 9.43; N, 3.76.

***tert*-Butyl (2*R*,3*S*)-3-acetoxy-2-(3-hydroxypropyl)-5-methoxypyrrolidine-1-carboxylate (12).**

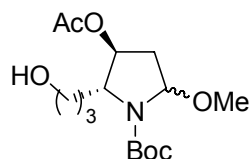

To a solution of compound **5** (800 mg, 2.20 mmol) in 20 mL of methanol was added NaBH<sub>4</sub> (324 mg, 8.60 mmol) at 0 °C. After stirring at the same temperature for 1 hour, the reaction was quenched with a saturated aqueous solution of NH<sub>4</sub>Cl (5 mL). The solvent was evaporated in vacuo. To the residue was added water (20 mL) and the aqueous phase extracted with CH<sub>2</sub>Cl<sub>2</sub> (3×30 mL). The combined organic layers were washed with brine (10 mL), dried over anhydrous Na<sub>2</sub>SO<sub>4</sub>. After filtration and concentration in vacuo, the residue and a catalytic amount of DMAP (40 mg, 0.33 mmol) were dissolved in anhydrous CH<sub>2</sub>Cl<sub>2</sub> (10 mL). To this solution were added pyridine (520 mg, 0.5 mL, 6.58 mmol) and Ac<sub>2</sub>O (890 mg, 0.80 mL, 8.72 mmol) at 0 °C. After stirring at room temperature for 2 hours, water (5 mL) was added at 0 °C. The aqueous phase was extracted with CH<sub>2</sub>Cl<sub>2</sub> (3×30 mL). The combined organic layers were washed successfully with a 1 M solution of HCl (10 mL) and brine (5 mL), dried over anhydrous Na<sub>2</sub>SO<sub>4</sub>, filtered, and concentrated in vacuo. The residue was dissolved in an I<sub>2</sub>-MeOH solution (50 mL, 1% g/mL) and stirred at room temperature for 8 hours. The reaction was quenched with a saturated aqueous solution of Na<sub>2</sub>S<sub>2</sub>O<sub>3</sub> (10 mL) at 0 °C. The solvent was evaporated in vacuo. To the resulting mixture was added water (20 mL) and the aqueous phase extracted with CH<sub>2</sub>Cl<sub>2</sub> (3×40 mL). The combined organic layers were washed with brine (10 mL), dried over anhydrous Na<sub>2</sub>SO<sub>4</sub>, filtered and concentrated at reduced pressure. Flash chromatography (EtOAc: PE = 2: 1) of the residue afforded compound **12** as a inseparable diastereomeric mixture (474 mg, 1.50 mmol, 68%). colorless oil; [α]<sub>D</sub><sup>20</sup> -31.1 (*c* 3.8, CHCl<sub>3</sub>); IR (film) 3461, 2976, 2937, 1741, 1701, 1442, 1391, 1367, 1316, 1241, 1169, 1130, 1087 cm<sup>-1</sup>; <sup>1</sup>H NMR (400 MHz, CDCl<sub>3</sub>) (1:1 diastereomeric mixture; a and b; determined by integration at δ 5.20-5.31 and 5.31-5.52 ) δ 1.49 (s, 9H<sub>a+b</sub>, *Ot*-Bu), 1.55-1.85 (m, 4H<sub>a+b</sub>), 2.03 (s, 3H<sub>a+b</sub>, OAc), 2.06-2.18 (m, 1H<sub>a+b</sub>, H-3), 2.22-2.41 (m, 1H<sub>a+b</sub>, H-3), 3.32 (m, 1.5H<sub>a</sub>, OMe), 3.35 (m, 1.5H<sub>b</sub>, OMe), 3.67 (t, *J* = 5.9 Hz, 2H<sub>a+b</sub>, CH<sub>2</sub>OH), 3.82-3.95 (m, 0.5H, H<sub>a</sub>), 3.95-4.09 (m, 0.5H, H<sub>b</sub>), 5.06-5.15 (m, 1H<sub>a+b</sub>), 5.20-5.31 (m, 0.5H<sub>a</sub>), 5.31-5.52 (m, 0.5H<sub>b</sub>); <sup>13</sup>C NMR (100 MHz, CDCl<sub>3</sub>)

(1:1 diastereomeric mixture)  $\delta$  21.3, 28.5, 28.7, 29.0, 30.3, 38.3, 39.2, 55.9, 56.2, 62.6, 62.9, 63.5, 77.5, 77.9, 80.8, 88.9, 154.5, 153.4, 170.7; MS (ESI)  $m/z$  340 ( $M+Na^+$ , 100%); Anal. calcd for  $C_{15}H_{27}NO_6$ : C, 56.77; H, 8.57; N, 4.41. Found: C, 56.59; H, 8.59; N, 4.40.

***tert*-Butyl (2*R*,3*S*)-3-acetoxy-2-(2-formylethyl)-5-methoxypyrrolidine-1-carboxylate (4).**

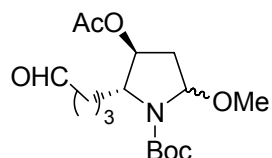

To a solution of Dess-Martin periodinane (2.670 g, 6.30 mmol) in 20 mL of  $CH_2Cl_2$  was added dropwise a 0.14 M  $CH_2Cl_2$  solution of compound **12** (660 mg, 2.10 mmol) at 0 °C. The resulting solution was stirred at the room temperature for 0.5 hour and diluted with  $Et_2O$  (30 mL) at 0 °C. To the resulting mixture were added an aqueous solution (15 mL) of  $Na_2S_2O_3$  (ca. 100-158 g/L) and  $NaHCO_3$  (ca. 100 g/L), and the resulting mixture was stirred for 15 min. The aqueous phase was extracted with  $CH_2Cl_2$  (3×30 mL). The combined organic layers were washed with brine (10 mL) and dried over anhydrous  $Na_2SO_4$ . After filtration and concentration in vacuo, the residue was purified by flash chromatography on silica gel ( $EtOAc$ :  $PE$  = 1 : 2) to afford compound **2** (484 mg, 1.54 mmol, 73%) as a inseparable diastereomeric mixture in 1:1 ratio. colorless oil;  $[\alpha]_D^{25}$   $-31.4$  ( $c$  2.06,  $CHCl_3$ ); IR (film): 2977, 2936, 2825, 2716, 1739, 1700, 1444, 1389, 1367, 1314, 1241, 1167, 1131, 1089  $cm^{-1}$ ;  $^1H$ -NMR (400 MHz,  $CDCl_3$ ) (1:1 diastereomeric mixture; a and b; determined by integration at  $\delta$  5.20-5.32 and 5.32-5.44)  $\delta$  1.49 (s,  $9H_{a+b}$ , *Ot*-Bu), 1.85-2.08 (m,  $2H_{a+b}$ ), 2.03 (s,  $3H_{a+b}$ , OAc), 2.08-2.20 (m,  $1H_{a+b}$ ), 2.25-2.40 (m,  $1H_{a+b}$ ), 2.47-2.65 (m,  $2H_{a+b}$ ,  $CHOCH_2$ ), 3.34 (s,  $1.5H_a$ , OMe), 3.37(s,  $1.5H_b$ , OMe), 3.86-3.95 (m,  $0.5H_a$ ), 3.95-4.04 (m,  $0.5H_b$ ), 5.05-5.12 (m,  $1H_{a+b}$ ), 5.20-5.32 (m,  $0.5H_a$ ), 5.32-5.44 (m,  $0.5H_b$ ), 9.80 (s,  $1H_{a+b}$ , CHO);  $^{13}C$  NMR (100 MHz,  $CDCl_3$ ) (1:1 diastereomeric mixture)  $\delta$  21.2, 25.8, 26.4, 28.5, 28.7, 36.1, 38.9, 40.2, 55.9, 56.3, 62.9, 80.7, 88.9, 154.5, 155.3, 170.6, 201.5; MS (ESI)  $m/z$  338 ( $M+Na^+$ , 100%); Anal. calcd for  $C_{15}H_{25}NO_6$ : C, 57.13; H, 7.99; N, 4.44. Found: C, 57.37; H, 7.97; N, 4.46.



**(1*R*,2*R*,5*R*,6*S*)-6-Acetyloxy-8-*tert*-butoxycarbonyl-8-azabicyclo[3.2.1]octan-2-ol**  
**(13).**

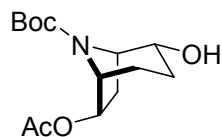

To a cooled solution ( $-50\text{ }^{\circ}\text{C}$ ) of compound **4** (460 mg, 1.46 mmol) in THF (60 mL) were added dropwise  $\text{BF}_3\cdot\text{OEt}_2$  (0.52 mL, 4.20 mmol), and a 0.1 M solution of  $\text{SmI}_2$  in THF (42 mL) containing *t*-BuOH (310 mg, 0.42 mL).<sup>[2]</sup> After stirring at the same temperature for 0.5 h, the reaction was quenched with saturated aqueous  $\text{NH}_4\text{Cl}$  (20 mL). The aqueous phase was extracted with EtOAc (4×30 mL). The combined organic layers were washed with brine, dried over anhydrous  $\text{Na}_2\text{SO}_4$ , filtered and concentrated in vacuo. The residue was purified by flash chromatography on silica gel (EtOAc: PE = 1: 1) to afford compound **13** (233 mg, 0.82 mmol, yield: 56%) as white crystals, and an inseparable mixture, which was further purified by flash chromatography on silica gel (eluent:  $\text{CH}_2\text{Cl}_2$ : MeOH = 15: 1) to afford compound **14** (21 mg, 0.074 mmol, yield: 5%) as a colorless oil, and the reduced product **15** (46 mg, 0.16 mmol, yield: 11%).

Diastereomer **13**: M.p. =  $113\text{-}114\text{ }^{\circ}\text{C}$  (EtOAc/PE);  $[\alpha]_{\text{D}}^{17} -51.2$  (*c* 4.3,  $\text{CHCl}_3$ ); IR (film): 3427, 2977, 2930, 2871, 1734, 1692, 1695, 1475, 1406, 1366, 1328, 1244, 1165, 1112, 1071, 1038  $\text{cm}^{-1}$ ;  $^1\text{H}$  NMR (500 MHz,  $\text{CDCl}_3$ ) (a 63:37 mixture of two rotamers; determined by integration at  $\delta$  3.70-3.78 and 3.78-3.85)  $\delta$  1.25-1.37 (m, 1H), 1.45 (s, 5.7 H, *t*-Bu), 1.48 (s, 3.3 H, *t*-Bu), 1.53-1.78 (m, 2H), 1.78-1.87 (m, 1H), 1.87-1.97 (m, 1H), 2.03 (s, 1.1H, OAc), 2.05 (s, 1.9 H, OAc), 2.47 (dd,  $J = 7.6, 14.5$  Hz, 1H, H-7), 2.77 (br s, 0.37H, OH,  $\text{D}_2\text{O}$  exchangeable), 3.48 (br s, 0.63H, OH,  $\text{D}_2\text{O}$  exchangeable), 3.70-3.78 (m, 0.37 H), 3.78-3.85 (m, 0.63H), 3.97-4.02 (m, 0.63 H), 4.07-4.12 (m, 0.37 H), 4.17-4.22 (m, 0.37 H), 4.32 (dd,  $J = 3.0, 7.1$  Hz, 0.63 H), 4.97 (dd,  $J = 2.2, 7.6$  Hz, 1H, H-6);  $^{13}\text{C}$  NMR (rotameric mixture) (125 MHz,  $\text{CDCl}_3$ )  $\delta$  21.3, 25.6, 26.1, 26.3, 26.8, 28.6, 31.5, 32.4, 58.7, 58.8, 59.2, 29.8, 66.9, 67.7, 76.6, 77.5, 80.1, 80.2, 153.8, 154.2, 171.1; MS (ESI)  $m/z$  308 ( $\text{M}+\text{Na}^+$ , 100%); HRMS calcd for  $\text{C}_{14}\text{H}_{23}\text{NNaO}_5$  [ $\text{M}+\text{Na}^+$ ]: 308.1468; found: 308.1475.

Diastereomer **14**:  $[\alpha]_{\text{D}}^{20} -31.7$  (*c* 1.18,  $\text{CHCl}_3$ ); IR (film): 3444, 2976, 2926, 2864, 1737, 1684, 1420, 1366, 1245, 1171, 1115, 1007  $\text{cm}^{-1}$ ;  $^1\text{H}$  NMR (a 65:35 mixture of two rotamers; determined by integration at  $\delta$  4.30-4.42 and 4.42-4.53) (400 MHz,

CDCl<sub>3</sub>)  $\delta$  1.48 (s, 9H, *t*-Bu), 1.51-1.69 (m, 4H), 1.93 (ddd,  $J = 2.5, 7.9, 14.4$  Hz, H-7), 2.04 (s, 3H), 2.12 (dd,  $J = 7.4, 14.4$ , Hz, H-7), 2.81 (br s, 1H, OH, D<sub>2</sub>O exchangeable), 3.62-3.80 (m, 1H), 4.07-4.14 (m, 0.65H), 4.19-4.30 (m, 0.35H), 4.30-4.42 (m, 0.35H), 4.42-4.53 (m, 0.65H), 5.05 (dd,  $J = 2.5, 7.4$  Hz, 1H, H-6); <sup>13</sup>C NMR (rotameric mixture) (100 MHz, CDCl<sub>3</sub>)  $\delta$  21.3, 23.7, 24.2, 24.9, 28.7, 35.2, 35.8, 58.5, 59.7, 60.8, 69.2, 69.8, 76.2, 77.5, 80.5, 156.4, 171.0; MS (ESI)  $m/z$  308 (M+Na<sup>+</sup>, 100%); HRMS calcd for C<sub>14</sub>H<sub>23</sub>NNaO<sub>5</sub> [M+Na]<sup>+</sup>: 308.1468; found: 308.1482.

***tert*-Butyl (2*R*,3*S*)-3-acetoxy-2-(3-hydroxypropyl)pyrrolidine-1-carboxylate (15).**

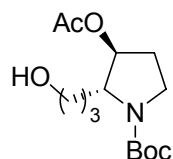

Colorless oil;  $[\alpha]_D^{25} -34.4$  ( $c$  1.19, CHCl<sub>3</sub>); IR (film): 3445, 2976, 2936, 1739, 1694, 1478, 1402, 1366, 1242, 1171, 1121, 1023 cm<sup>-1</sup>; <sup>1</sup>H NMR (rotameric mixture) (400 MHz, CDCl<sub>3</sub>)  $\delta$  1.47 (s, 9H, *t*-Bu), 1.58-1.85 (m, 4H), 1.92-2.00 (m, 1H), 2.05 (s, 3H), 2.08-2.20 (m, 1H), 3.40-3.55 (m, 2H, H-5), 3.61-3.76 (m, 2H, OCH<sub>2</sub>), 3.64-3.89 (m, 1H, H-2), 4.98-5.05 (m, 1H); <sup>13</sup>C NMR (rotameric mixture) (100 MHz, CDCl<sub>3</sub>) 21.5, 28.7, 28.8, 28.9, 29.6, 29.7, 29.9, 44.3, 44.6, 62.3, 62.7, 63.1, 63.7, 78.0, 79.9, 154.9, 155.1, 170.8, 170.9; MS (ESI)  $m/z$  310 (M+Na<sup>+</sup>, 100%); Anal. calcd for C<sub>14</sub>H<sub>25</sub>NO<sub>5</sub>: C, 58.52; H, 8.77; N, 4.87. Found: C, 58.37; H, 8.75; N, 4.88.

**(1*R*,5*R*,6*S*)-6-Acetyloxy-8-(*tert*-butoxycarbonyl)-8-azabicyclo[3.2.1]octan-2-one (16).**

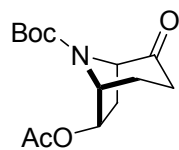

To a solution of Dess-Martin periodinane (445 mg, 1.05 mmol) in 8 mL of CH<sub>2</sub>Cl<sub>2</sub> was added dropwise a CH<sub>2</sub>Cl<sub>2</sub> (5 mL) solution of compound **13** (120 mg, 0.42 mmol) at 0 °C. The resulting solution was stirred at room temperature for 0.5 hour and diluted with Et<sub>2</sub>O (15 mL) at 0 °C. An aqueous solution (10 mL) of Na<sub>2</sub>S<sub>2</sub>O<sub>3</sub> (*ca.* 100-158 g/L) and NaHCO<sub>3</sub> (*ca.* 100 g/L) was added and the resulting mixture was stirred for 15 min. The aqueous phase was extracted with CH<sub>2</sub>Cl<sub>2</sub> (3×30 mL). The combined organic layers were washed with brine (10 mL), dried over anhydrous Na<sub>2</sub>SO<sub>4</sub>,

filtered and concentrated in vacuo. The residue was purified by flash chromatography on silica gel (EtOAc: PE = 1 : 2) to afford compound **16** (102 mg, 0.36 mmol, 86%) as a colorless oil.  $[\alpha]_D^{25} -43.4$  ( $c$  1.96,  $\text{CHCl}_3$ ); IR (film): 2977, 2930, 1734, 1700, 1391, 1369, 1322, 1292, 1243, 1155, 1107, 1031, 1006  $\text{cm}^{-1}$ ;  $^1\text{H-NMR}$  (400 MHz,  $\text{CDCl}_3$ ) (a 60:40 mixture of two rotamers; determined by integration at  $\delta$  4.39-4.48 and 4.46-4.62)  $\delta$  1.46 (s, 9H, *t*-Bu), 1.92-2.00 (m, 1H), 2.08 (s, 3H, OAc), 2.18-2.35 (m, 3H), 2.37-2.45 (m, 2H,  $\text{CH}_2\text{CO}$ ), 4.26-4.39 (m, 1H), 4.39-4.48 (m, 0.6H), 4.48-4.62 (m, 0.4H), 5.14 (dd,  $J = 2.9, 7.3$  Hz, 1H,  $\text{CHOAc}$ );  $^{13}\text{C NMR}$  (100 MHz,  $\text{CDCl}_3$ ) (a 60:40 mixture of two rotamers)  $\delta$  21.2, 26.1, 28.5, 32.8, 36.4, 59.0, 64.5, 76.4, 81.1, 154.1, 170.9, 204.8; MS (ESI)  $m/z$  306 ( $\text{M}+\text{Na}^+$ , 100%); HRMS calcd for  $\text{C}_{14}\text{H}_{21}\text{NNaO}_5$  [ $\text{M}+\text{Na}^+$ ]: 306.1312; found: 306.1324.

**(1R,2S,5R,6S)-6-Acetyloxy-8-(tert-butoxycarbonyl)-8-azabicyclo[3.2.1]octan-2-ol (12).**

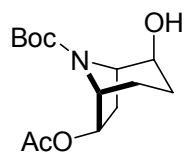

To a cooled solution ( $-78$  °C) of compound **14** (30 mg, 0.11 mmol) in THF (3 mL) was added dropwise a THF solution of L-selectride (0.15 mmol, 0.15 mL, 1.0 M). After stirring for 0.5 h, the reaction was quenched with saturated aqueous  $\text{NH}_4\text{Cl}$  (5 mL). The aqueous phase was extracted with  $\text{CH}_2\text{Cl}_2$  ( $4 \times 10$  mL). The combined organic layers were washed with brine, dried over anhydrous  $\text{Na}_2\text{SO}_4$ , filtered and concentrated in vacuo. The residue was purified by flash chromatography on silica gel (EtOAc: PE = 1: 1) to afford compound **12** as a colorless oil (26 mg, 0.091 mmol, 84%).

**(1R,2S,5R,6S)-6-Acetyloxy-8-azabicyclo[3.2.1]octan-2-ol (1).**

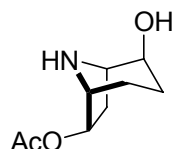

To a cooled solution ( $0$  °C) of compound **14** (35 mg, 0.12 mmol) in  $\text{CH}_2\text{Cl}_2$  (0.4 mL) was added dropwise 2,6-lutidine (45 mg, 0.42 mmol, 0.05 mL) and TMSOTf (69 mg, 0.31 mmol, 0.06 mL). After stirring at room temperature for 0.5 h, the reaction was

quenched with saturated aqueous  $\text{NH}_4\text{Cl}$  (2 mL) at 0 °C. The aqueous phase was extracted with  $\text{Et}_2\text{O}$  (4×5 mL). The combined organic layers were washed with brine, dried over anhydrous  $\text{Na}_2\text{SO}_4$ , filtered and concentrated in vacuo. The residue was dissolved in THF (5 mL). To the resultant solution was added a solution of TBAF (0.15 mmol, 0.15 mL, 0.1 M in THF) at 0 °C. The resulting solution was stirred for 10 min and quenched with saturated aqueous  $\text{NH}_4\text{Cl}$  (2 mL) at 0 °C. The aqueous phase was extracted with  $\text{Et}_2\text{O}$  (3×5 mL) and the combined organic layers were washed with brine, dried over anhydrous  $\text{Na}_2\text{SO}_4$ , filtered and concentrated in vacuo. The residue was purified by flash chromatography on basic alumina ( $\text{CH}_2\text{Cl}_2$ : PE = 1: 2) to afford compound **1** (16 mg, 72%) as a colorless crystalline solid. M.p. = 75-76 °C ( $\text{CH}_2\text{Cl}_2/\text{PE}$ ) (lit.<sup>3</sup> M.p. 76-78 °C).  $[\alpha]_{\text{D}}^{24}$  -31.6 (*c* 0.59, EtOH) {lit.<sup>3</sup>  $[\alpha]_{\text{D}}^{25}$  -29.6 (*c* 0.97, EtOH)}; IR (film): 3360, 2942, 2867, 1731, 1650, 1441, 1376, 1243, 1180, 1094, 1025  $\text{cm}^{-1}$ ;  $^1\text{H}$  NMR (400 MHz,  $\text{CDCl}_3$ ) 1.48-1.59 (m, 3H), 1.78 (ddd, *J* = 2.1, 6.7, 14.7 Hz, 1H, H-7), 1.83-1.92 (m, 1H), 2.04 (s, 3H, OAc), 2.16 (dd, *J* = 7.0, 14.7 Hz, 1H, H-7), 2.65 (br s, 2H,  $\text{D}_2\text{O}$  exchangeable, NH and OH), 3.27-3.33 (m, 1H, H-2), 3.53-3.58 (m, 2H, H-1 and H-5), 5.13 (dd, *J* = 2.1, 7.0 Hz, 1H, H-6);  $^{13}\text{C}$  NMR (100 MHz,  $\text{CDCl}_3$ )  $\delta$  21.5, 25.0, 25.3, 37.4, 60.8, 61.4, 67.7, 78.3, 170.9; MS (ESI) *m/z* 186 ( $\text{M}+\text{H}^+$ , 100%); HRMS calcd for  $\text{C}_9\text{H}_{16}\text{NO}_3$  [ $\text{M}+\text{H}^+$ ]: 186.1125; found: 186.1121.

## Reference

1. J. M. Luo, C. F. Dai, S. Y. Lin and P.-Q. Huang, *Chem. Asian. J.*, 2009, **4**, 328-335.
2. Y. G. Xiang, X. W. Wang, X. Zeng, Y. P. Ruan and P.-Q. Huang, *Chem. Commun.*, 2009, **45**, 7045-7047.
3. Y. Q. Zhang and L. S. Liebeskind, *J. Am. Chem. Soc.*, 2006, **128**, 465-472.

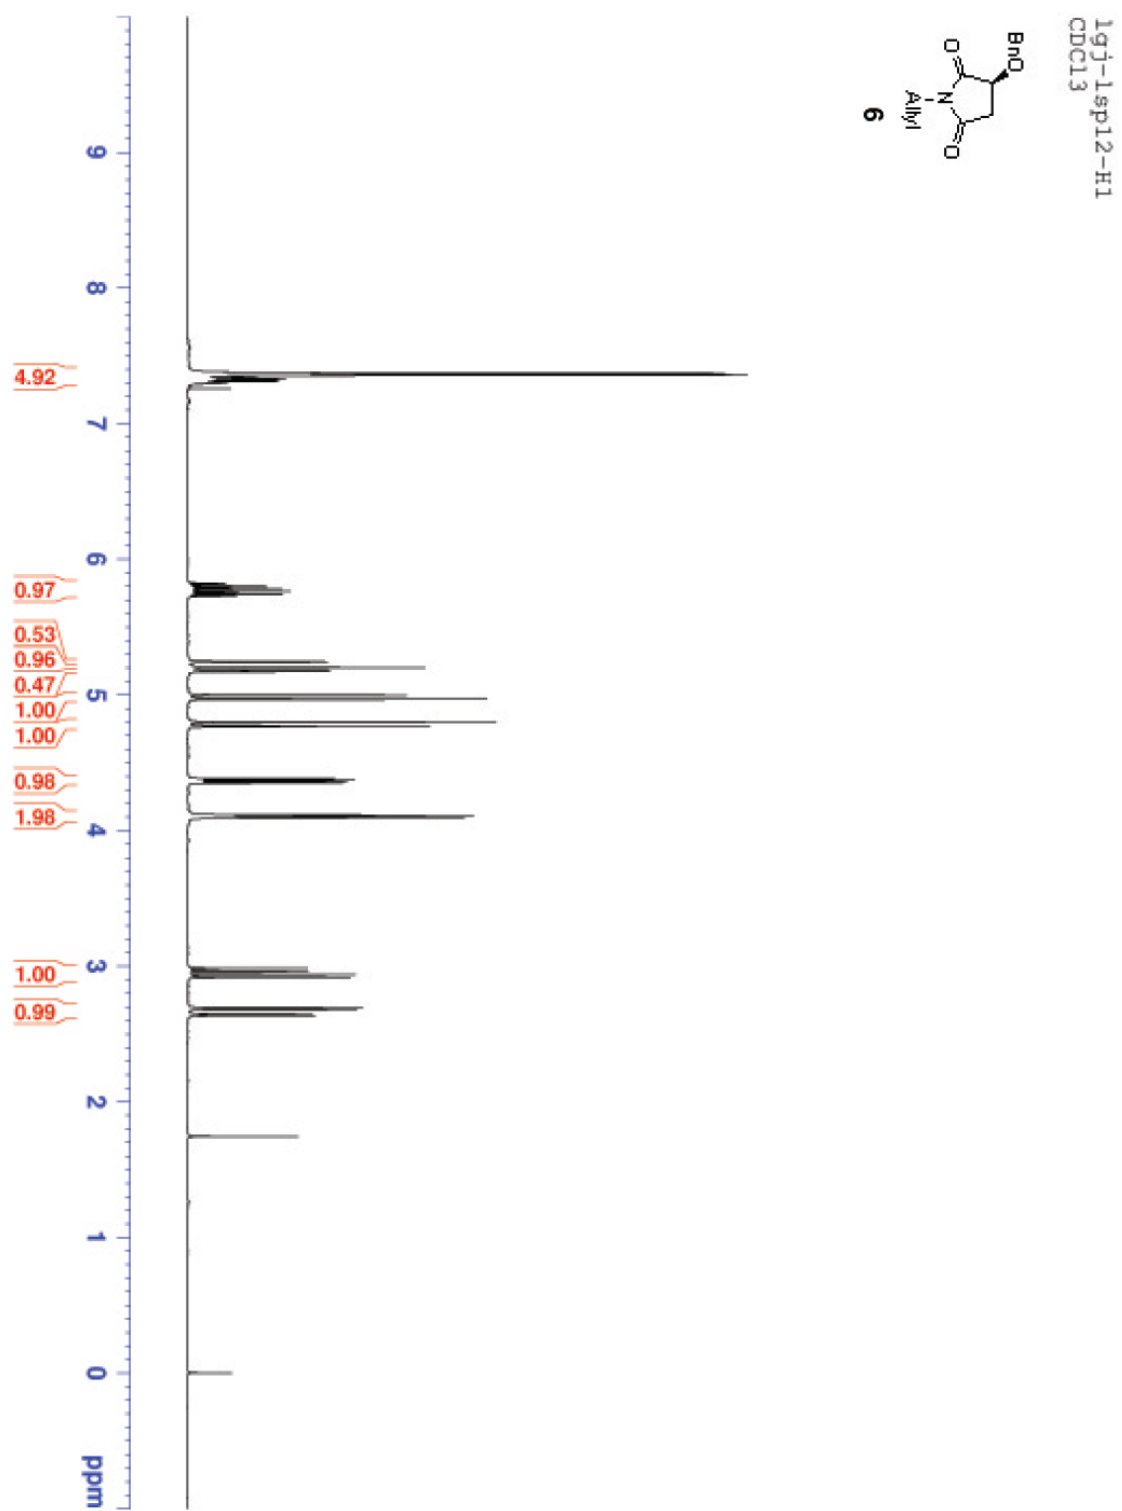

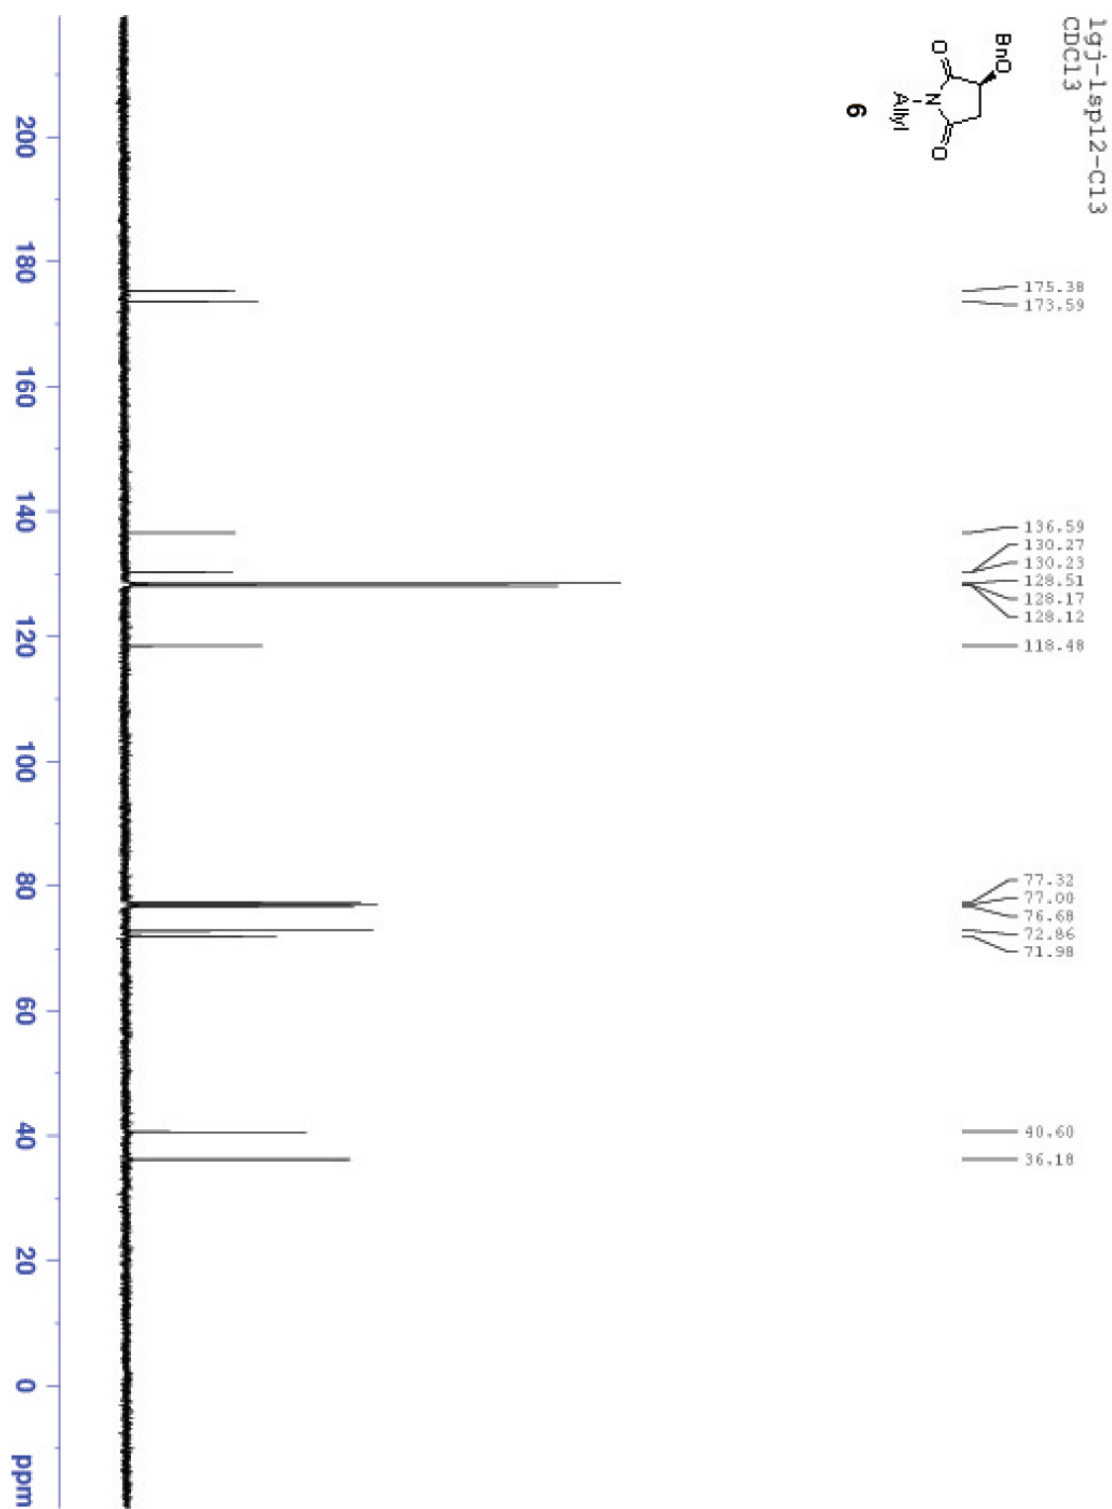

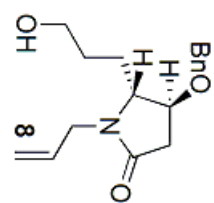

1gJ379a-H1  
CDCl3

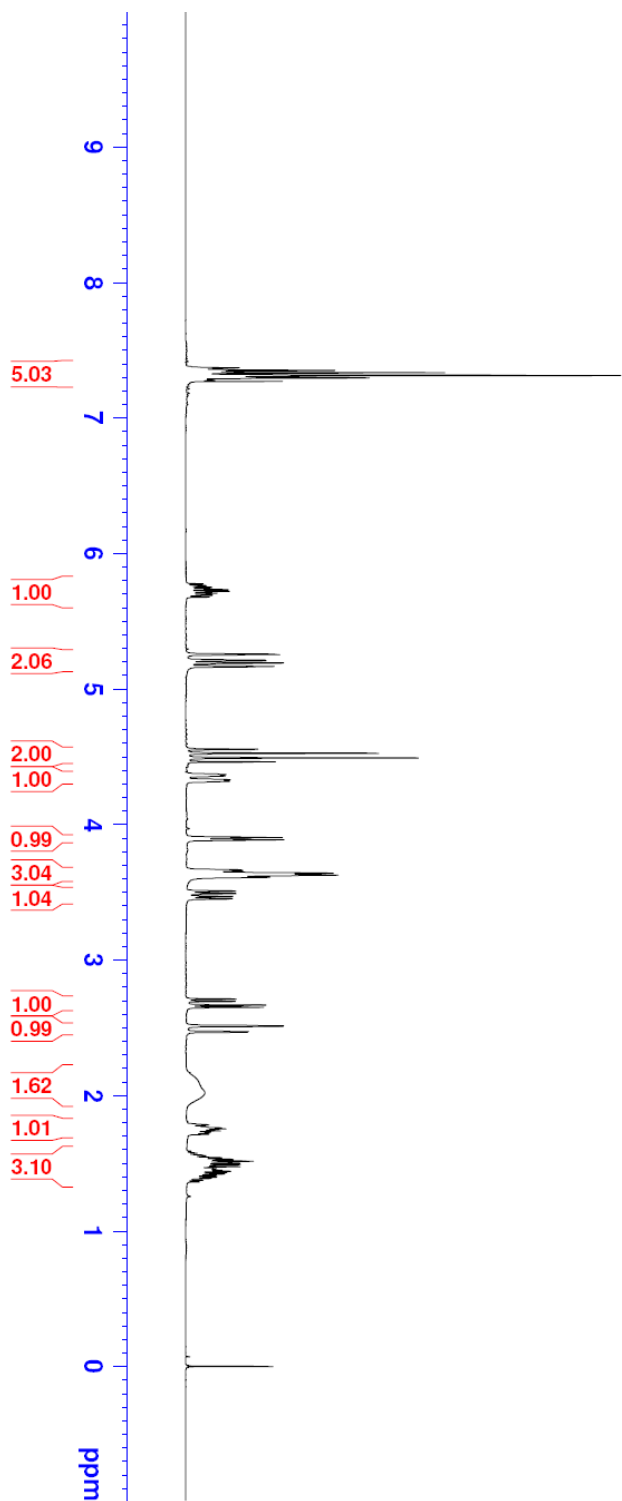

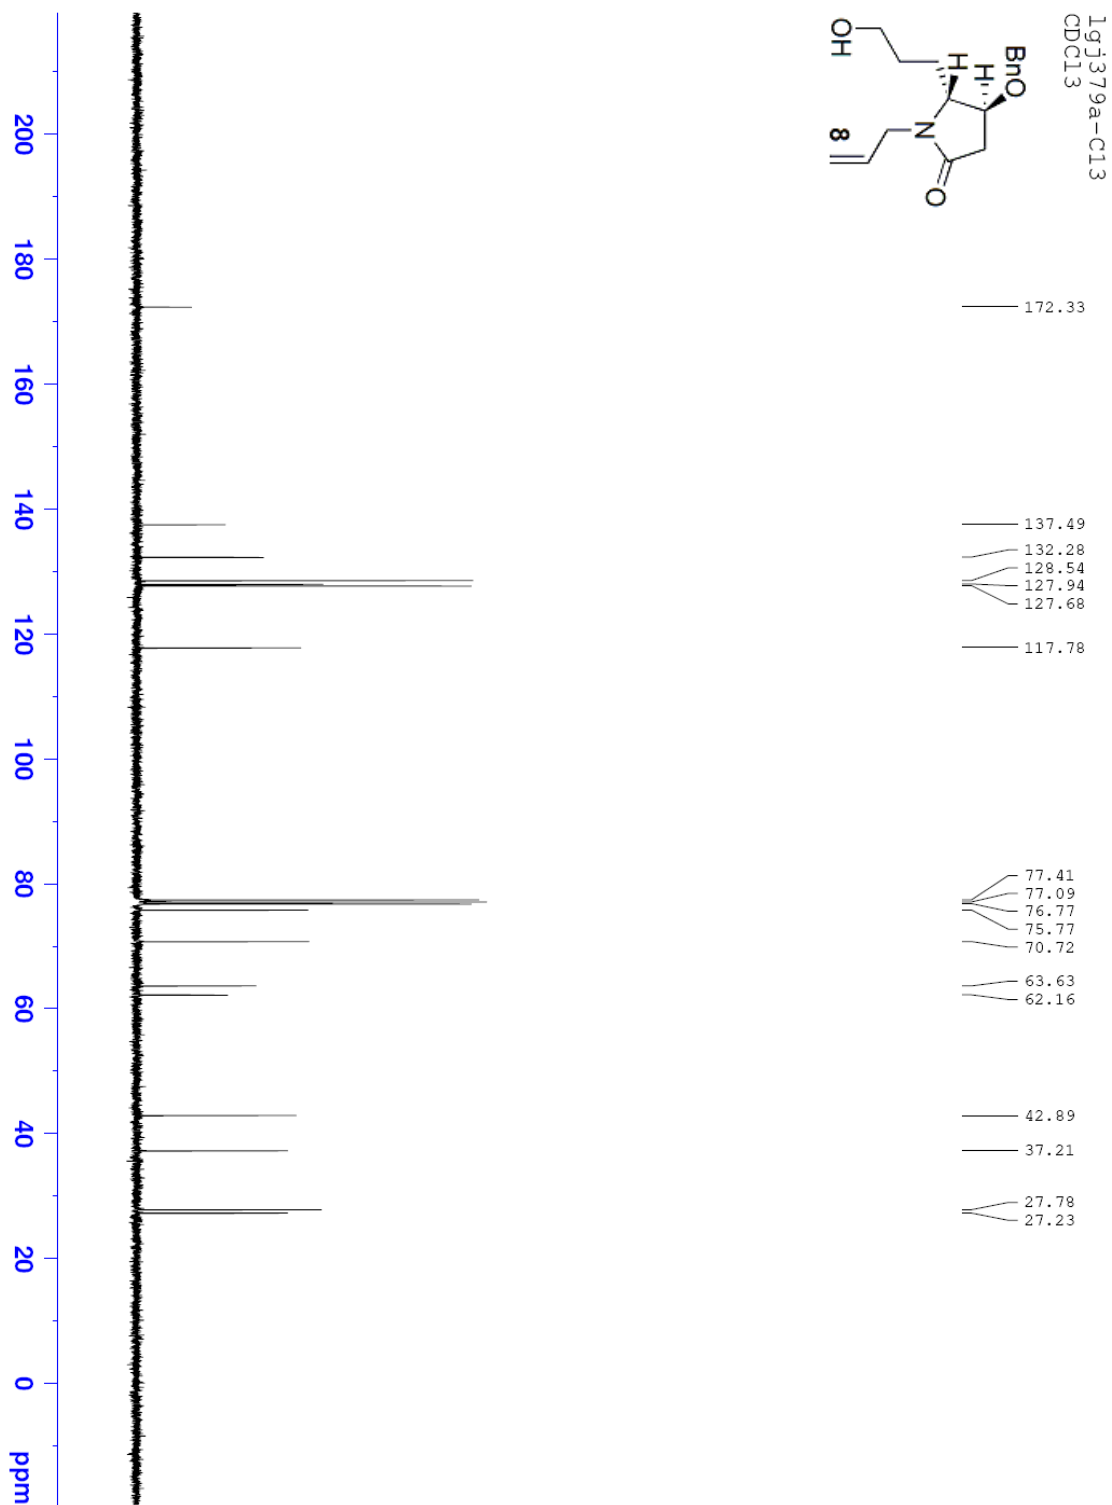



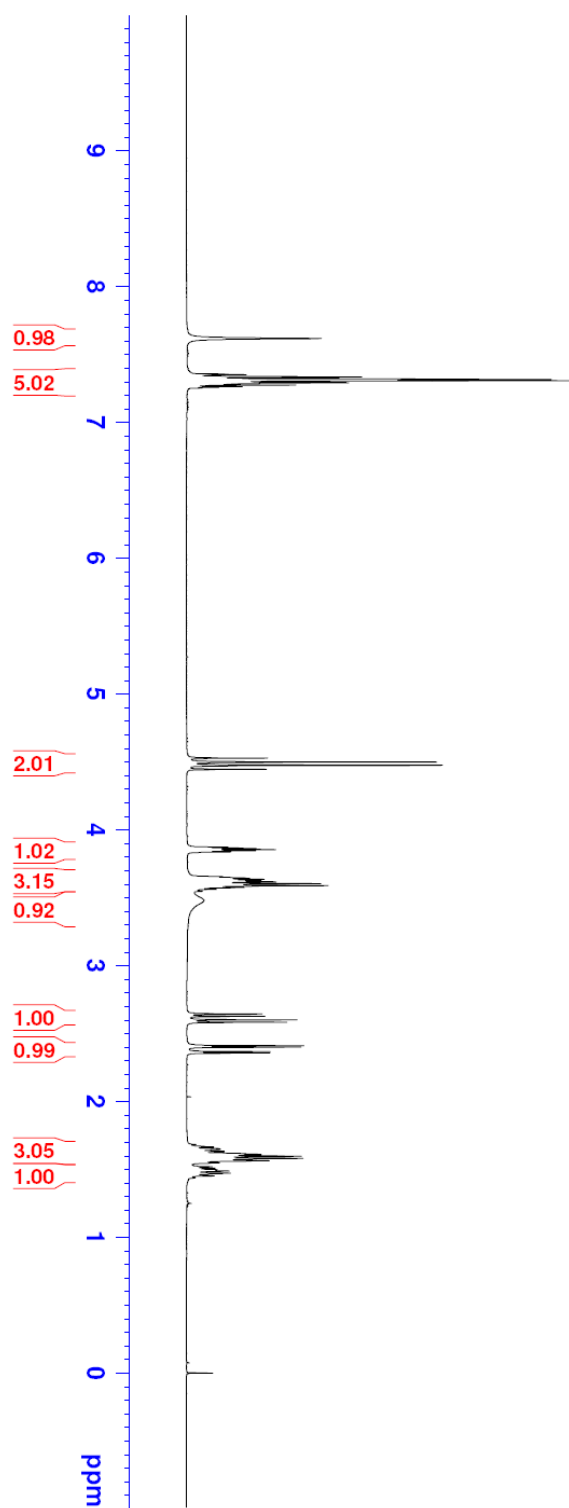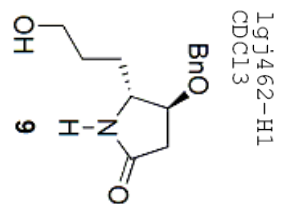

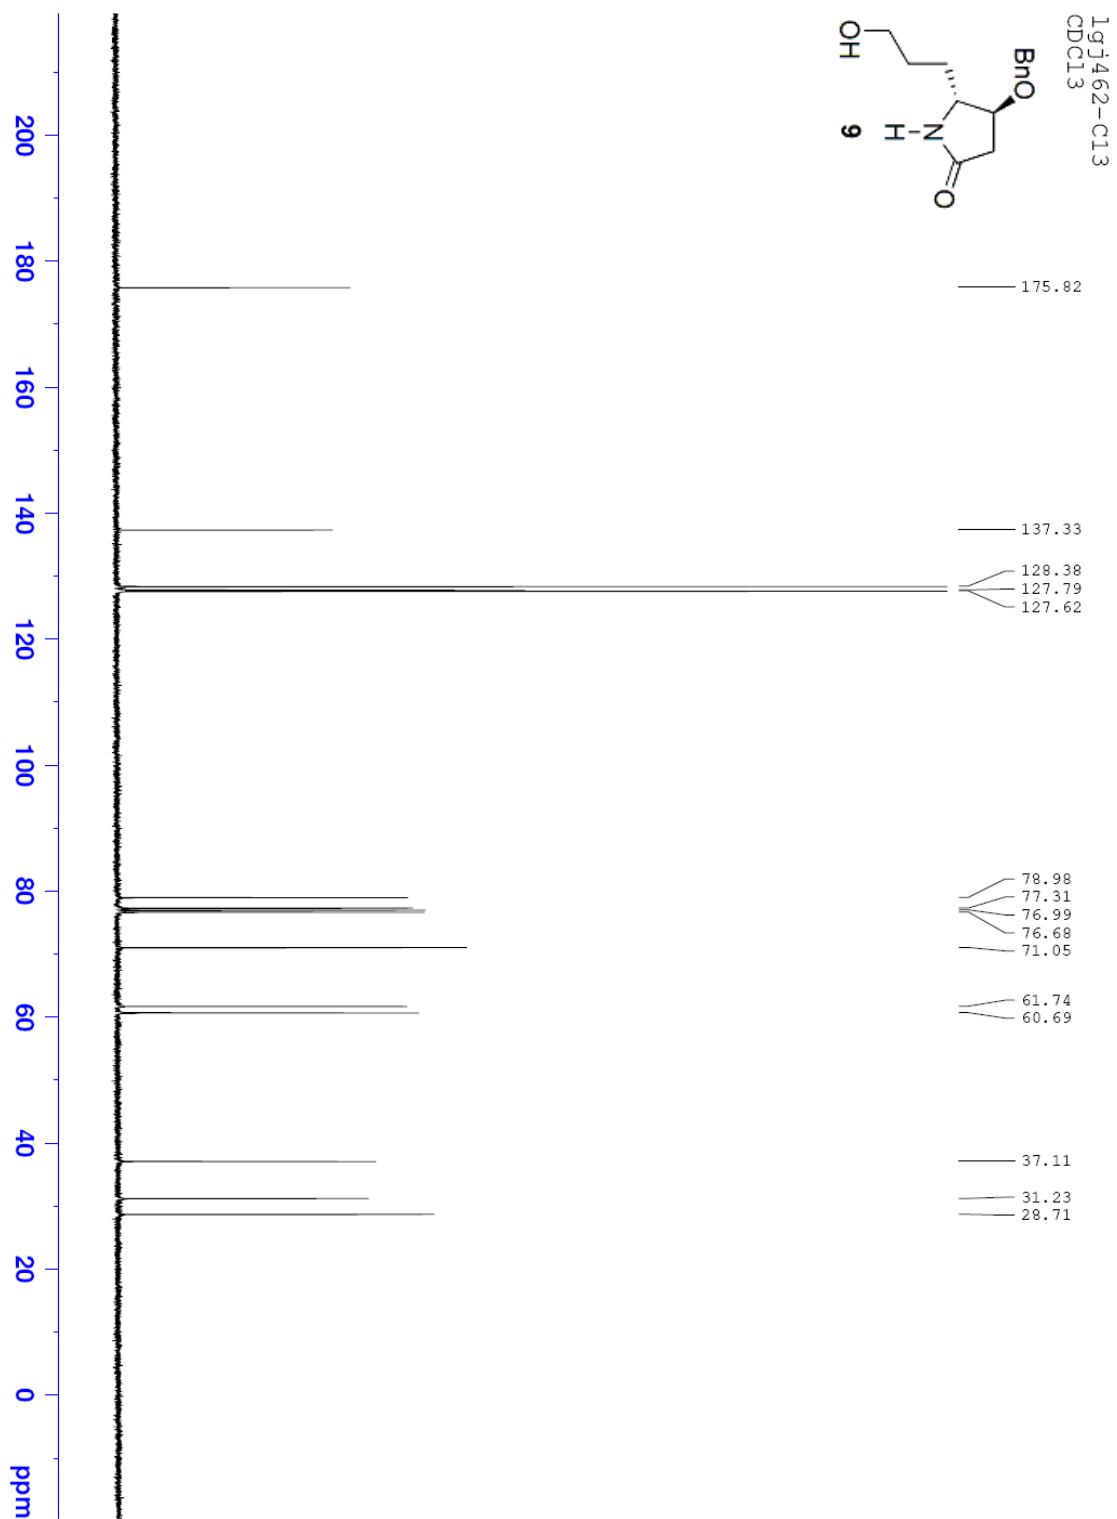

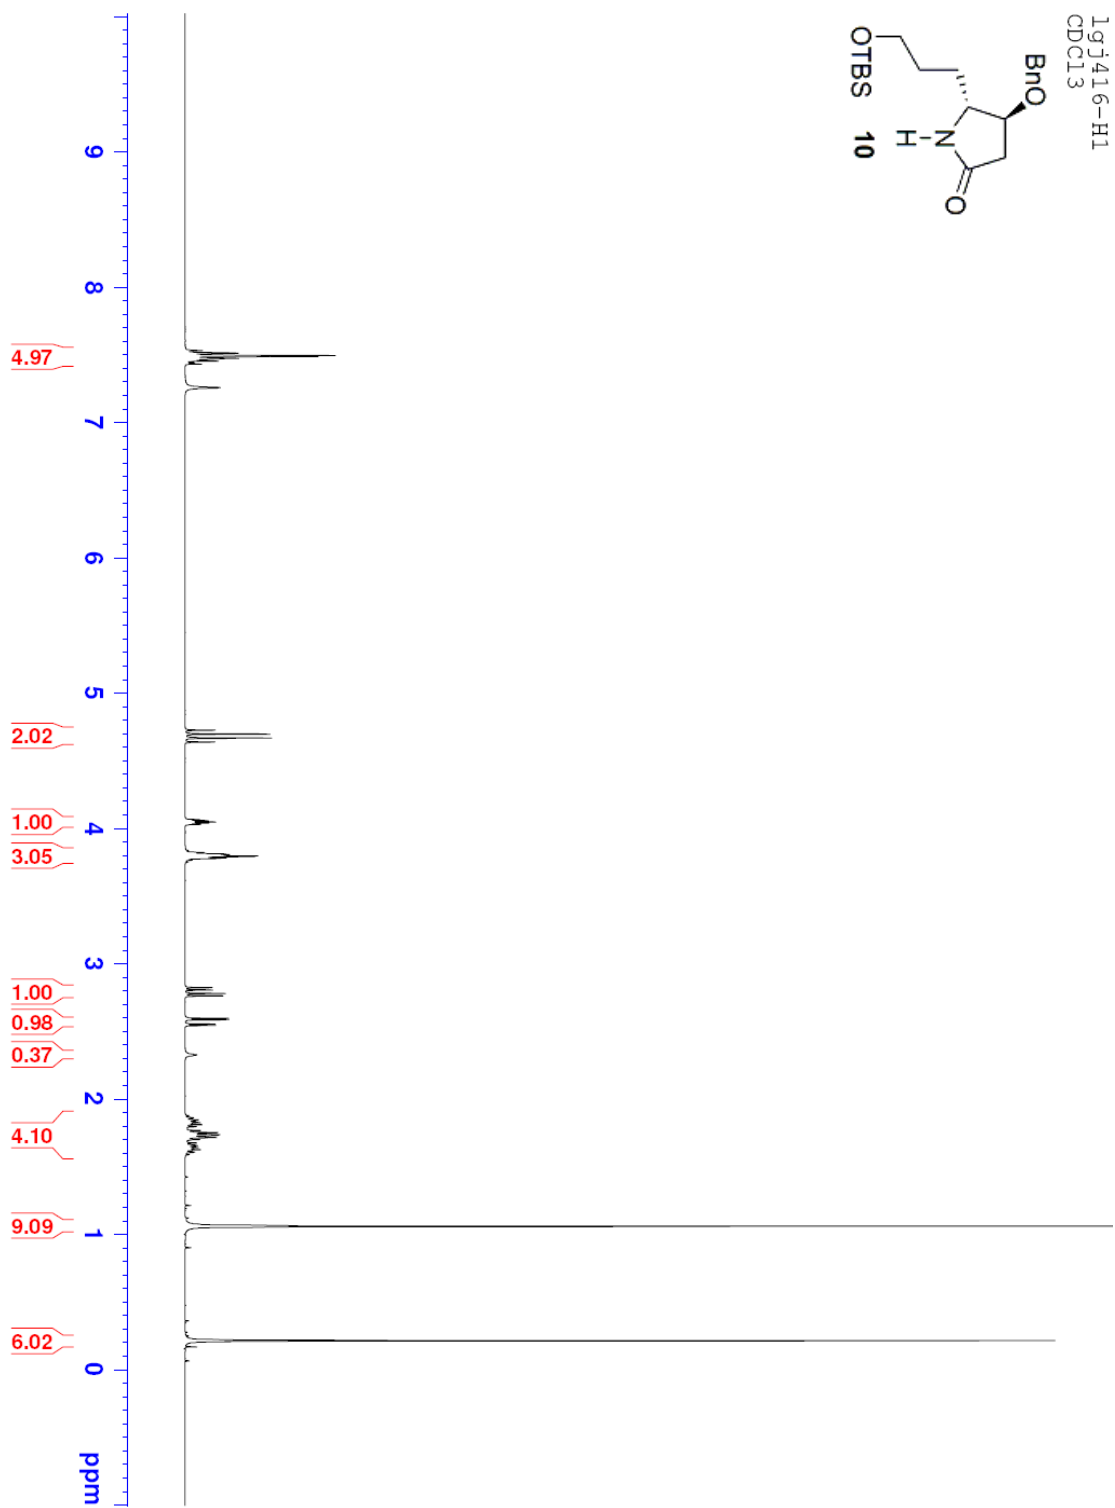

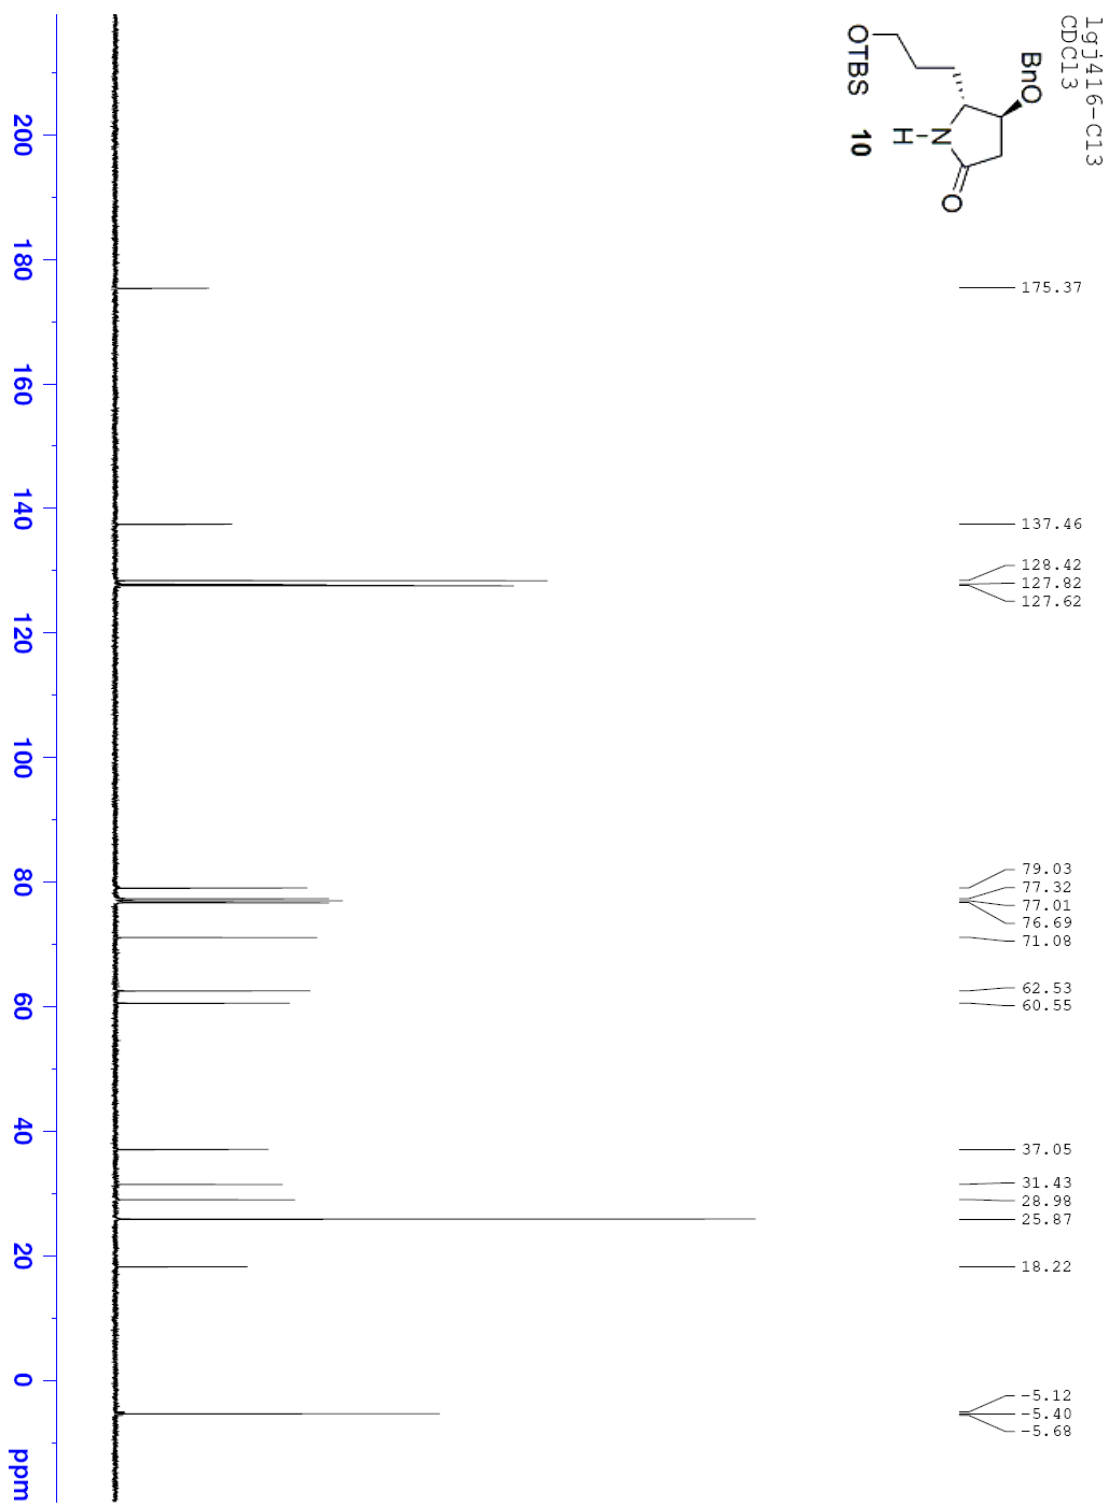

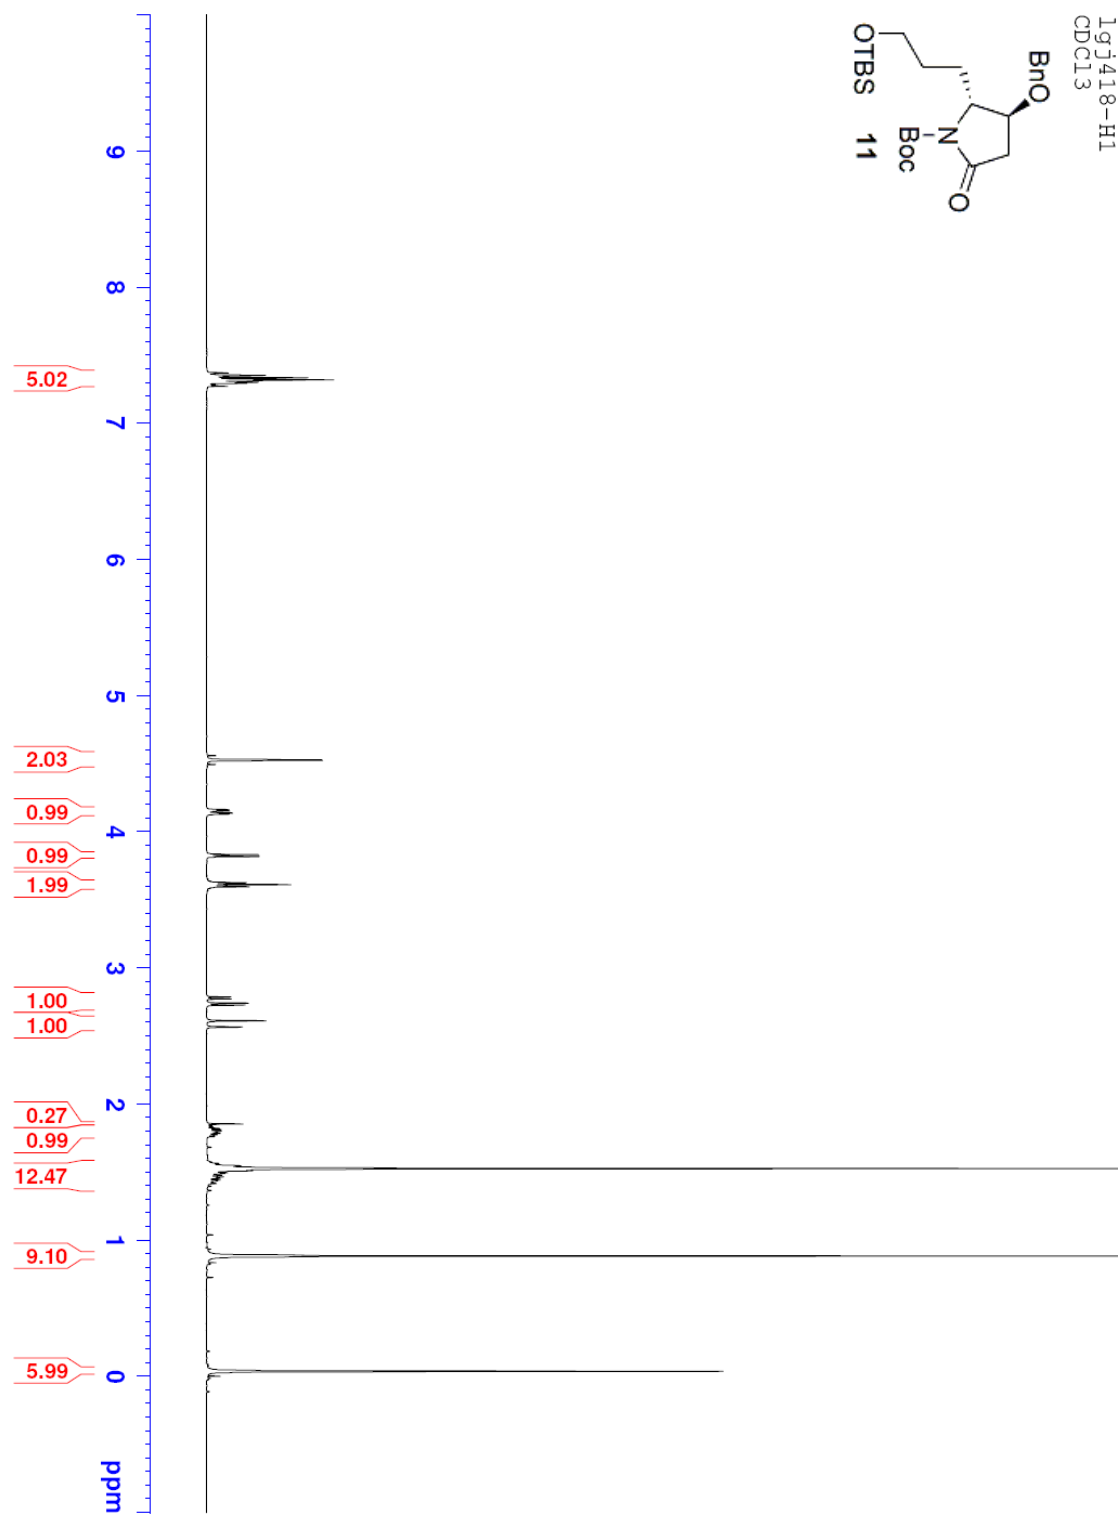

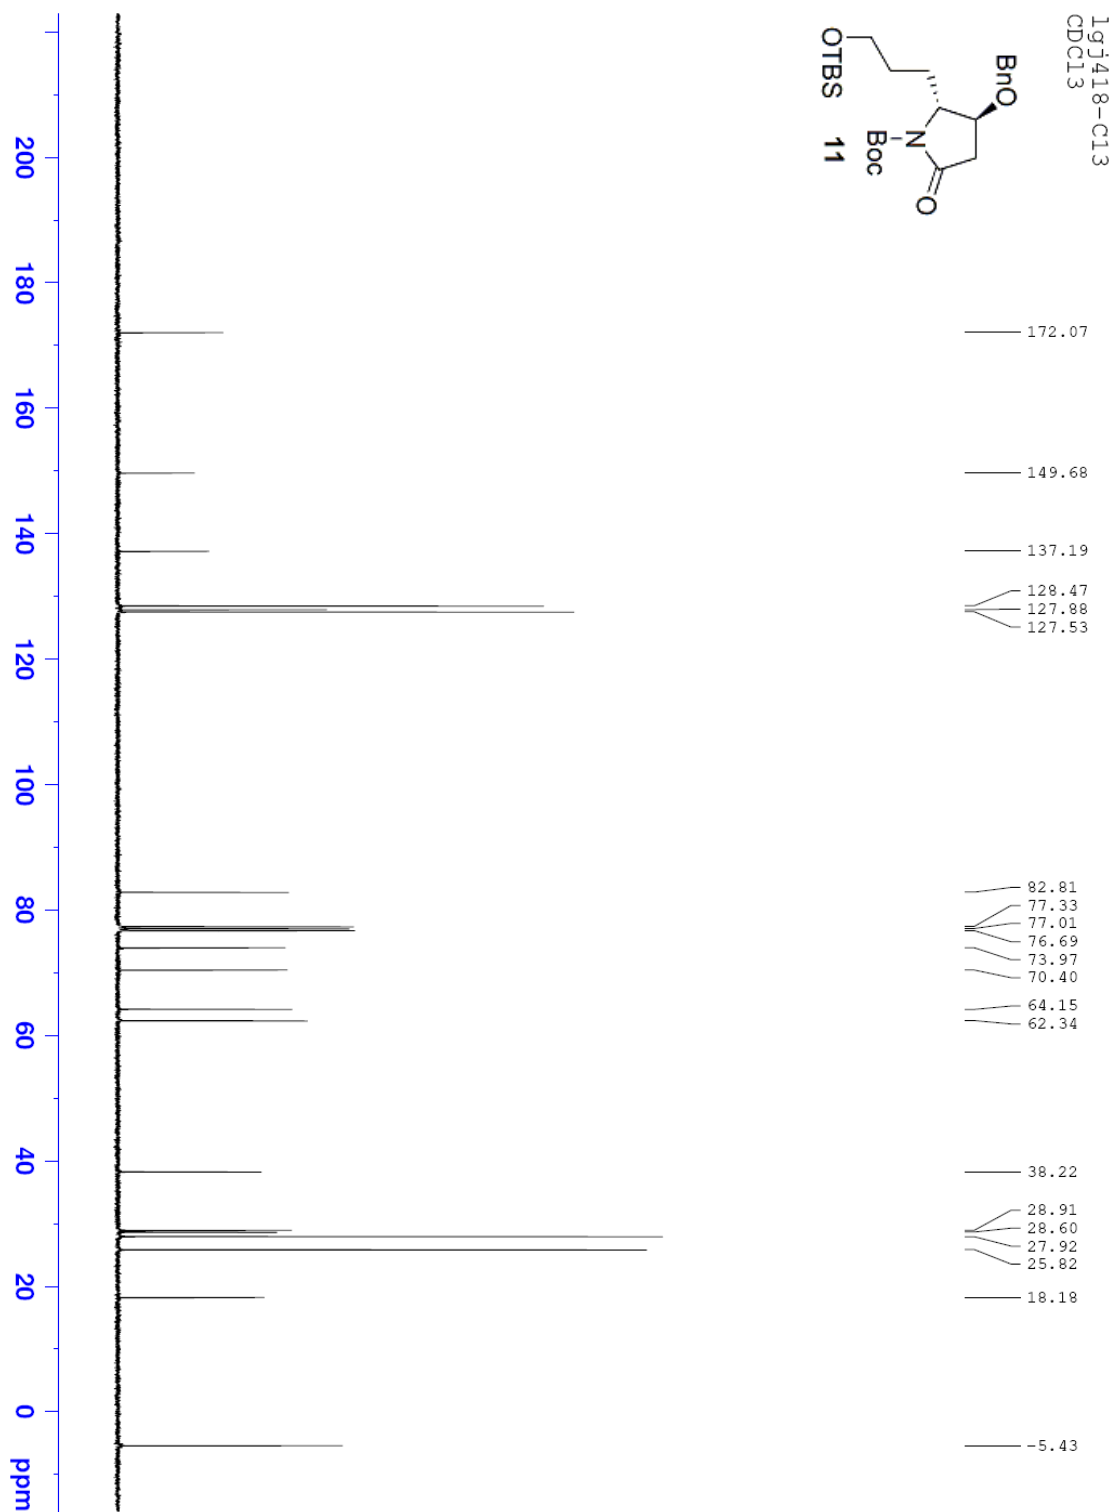

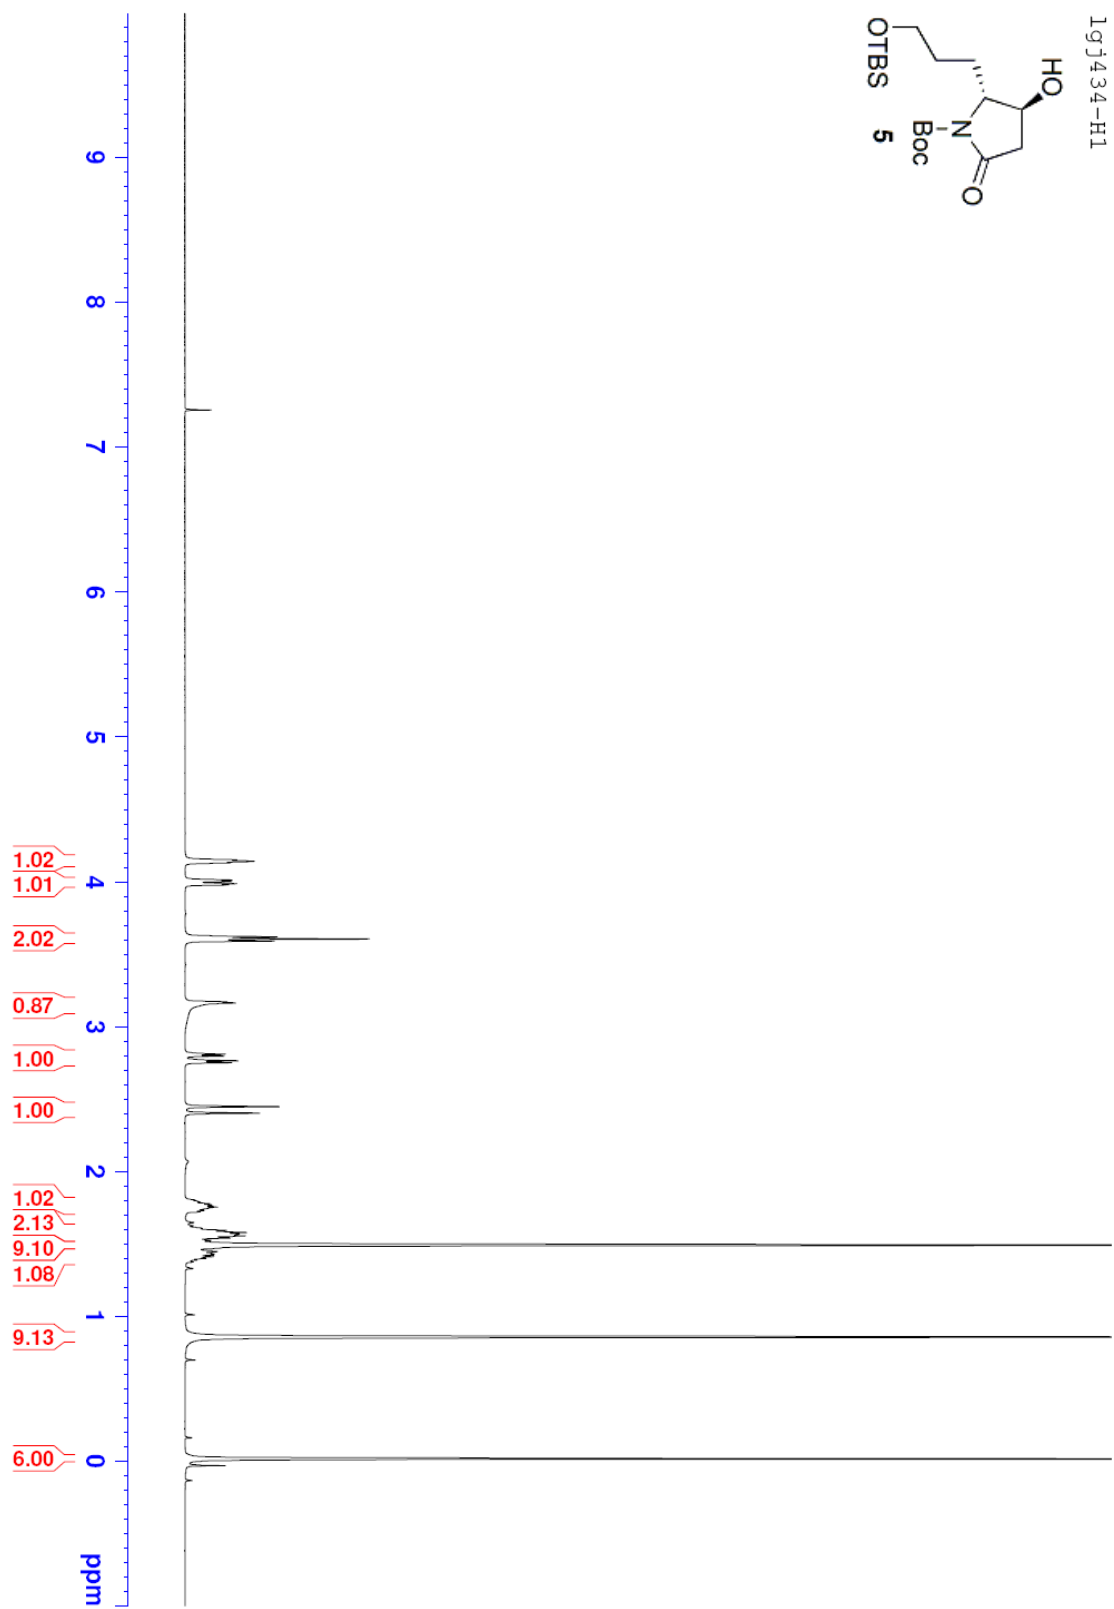

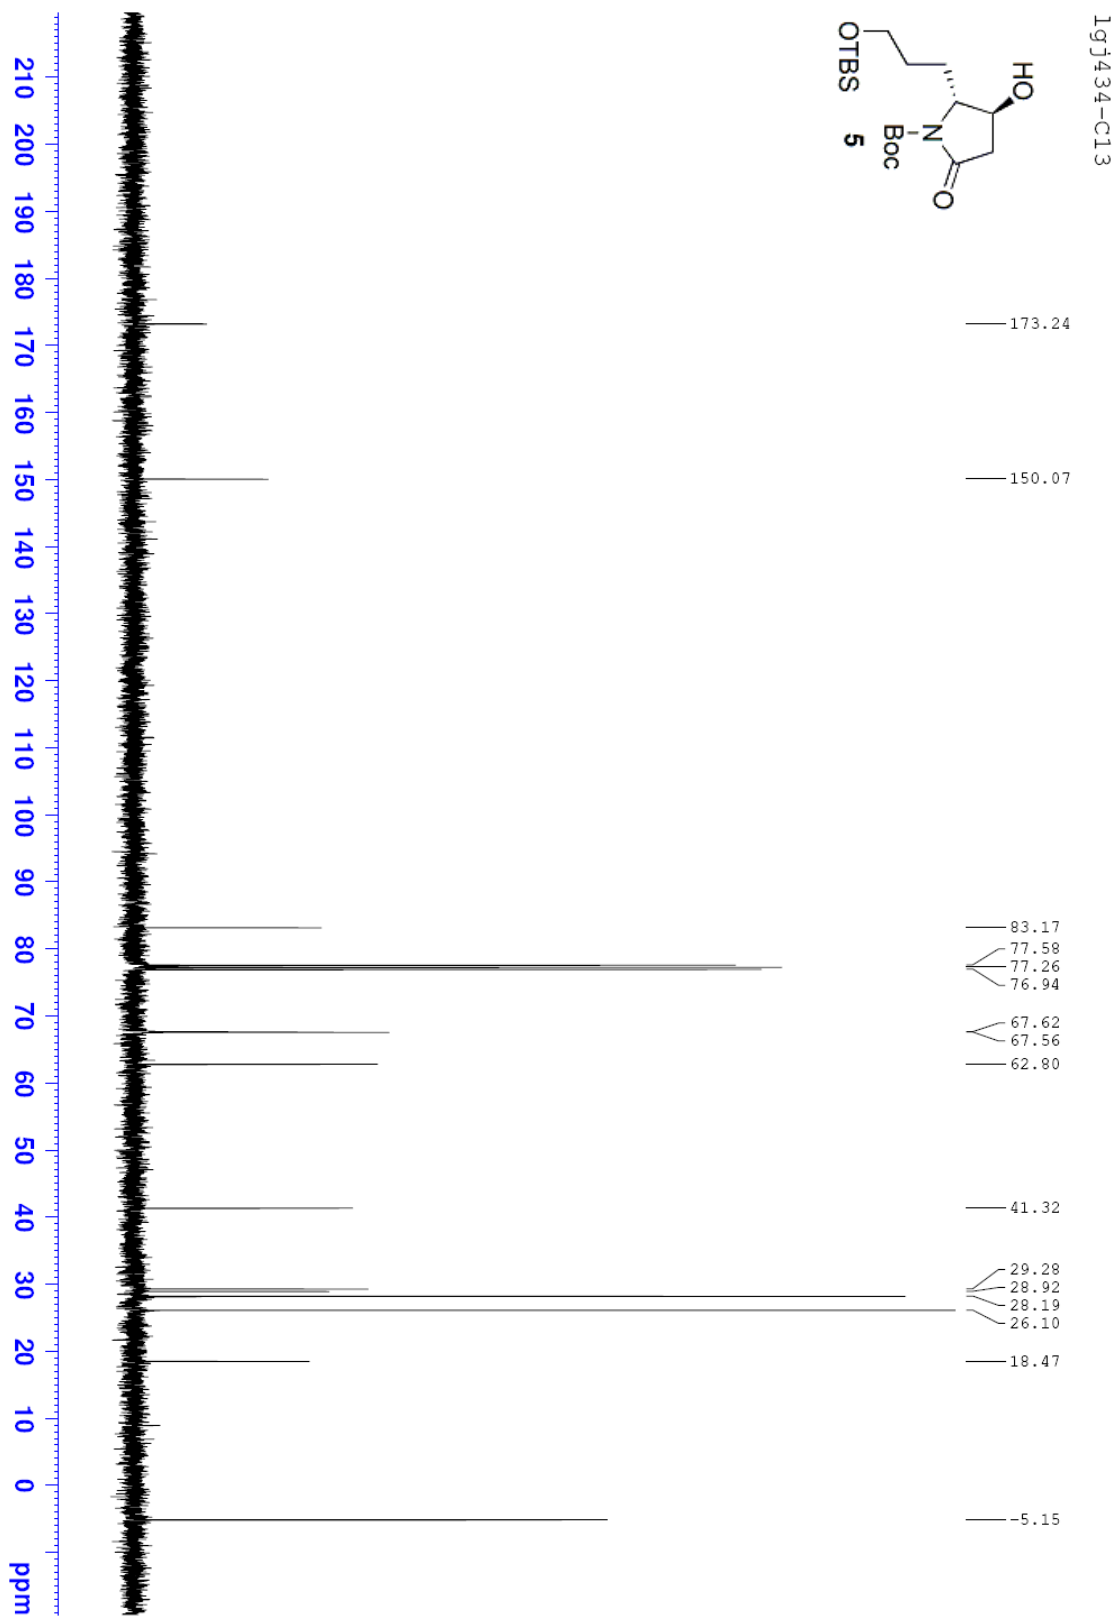



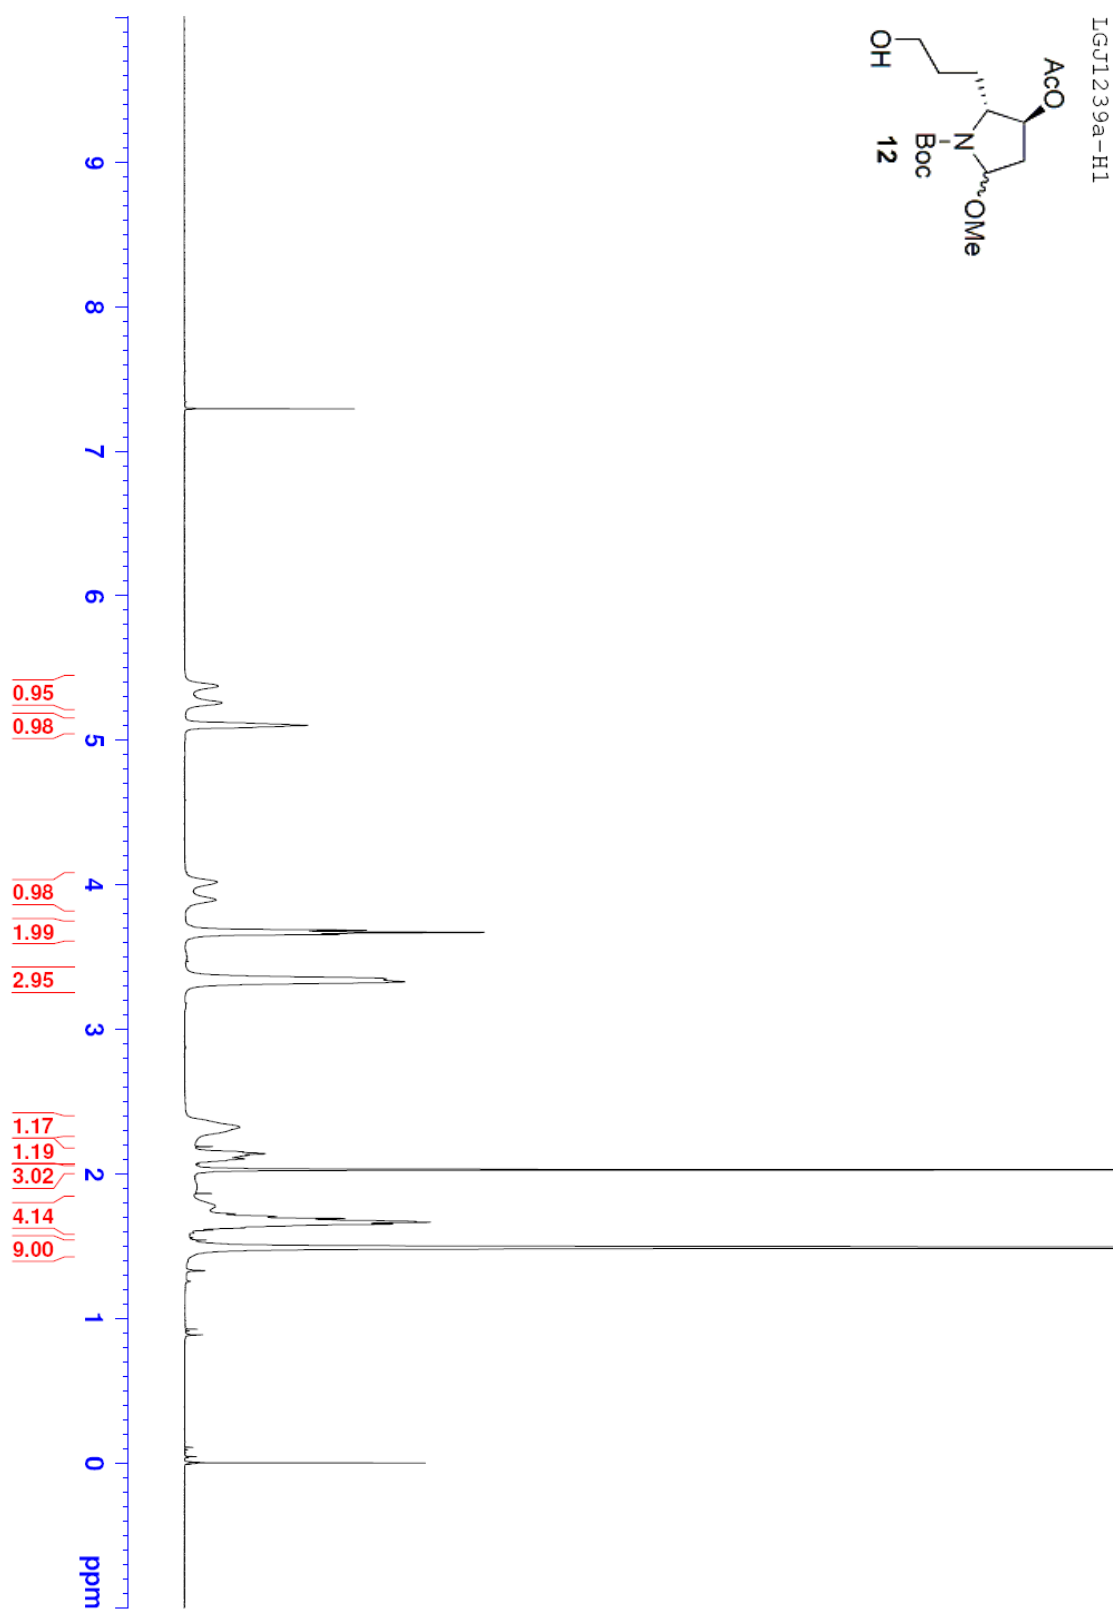

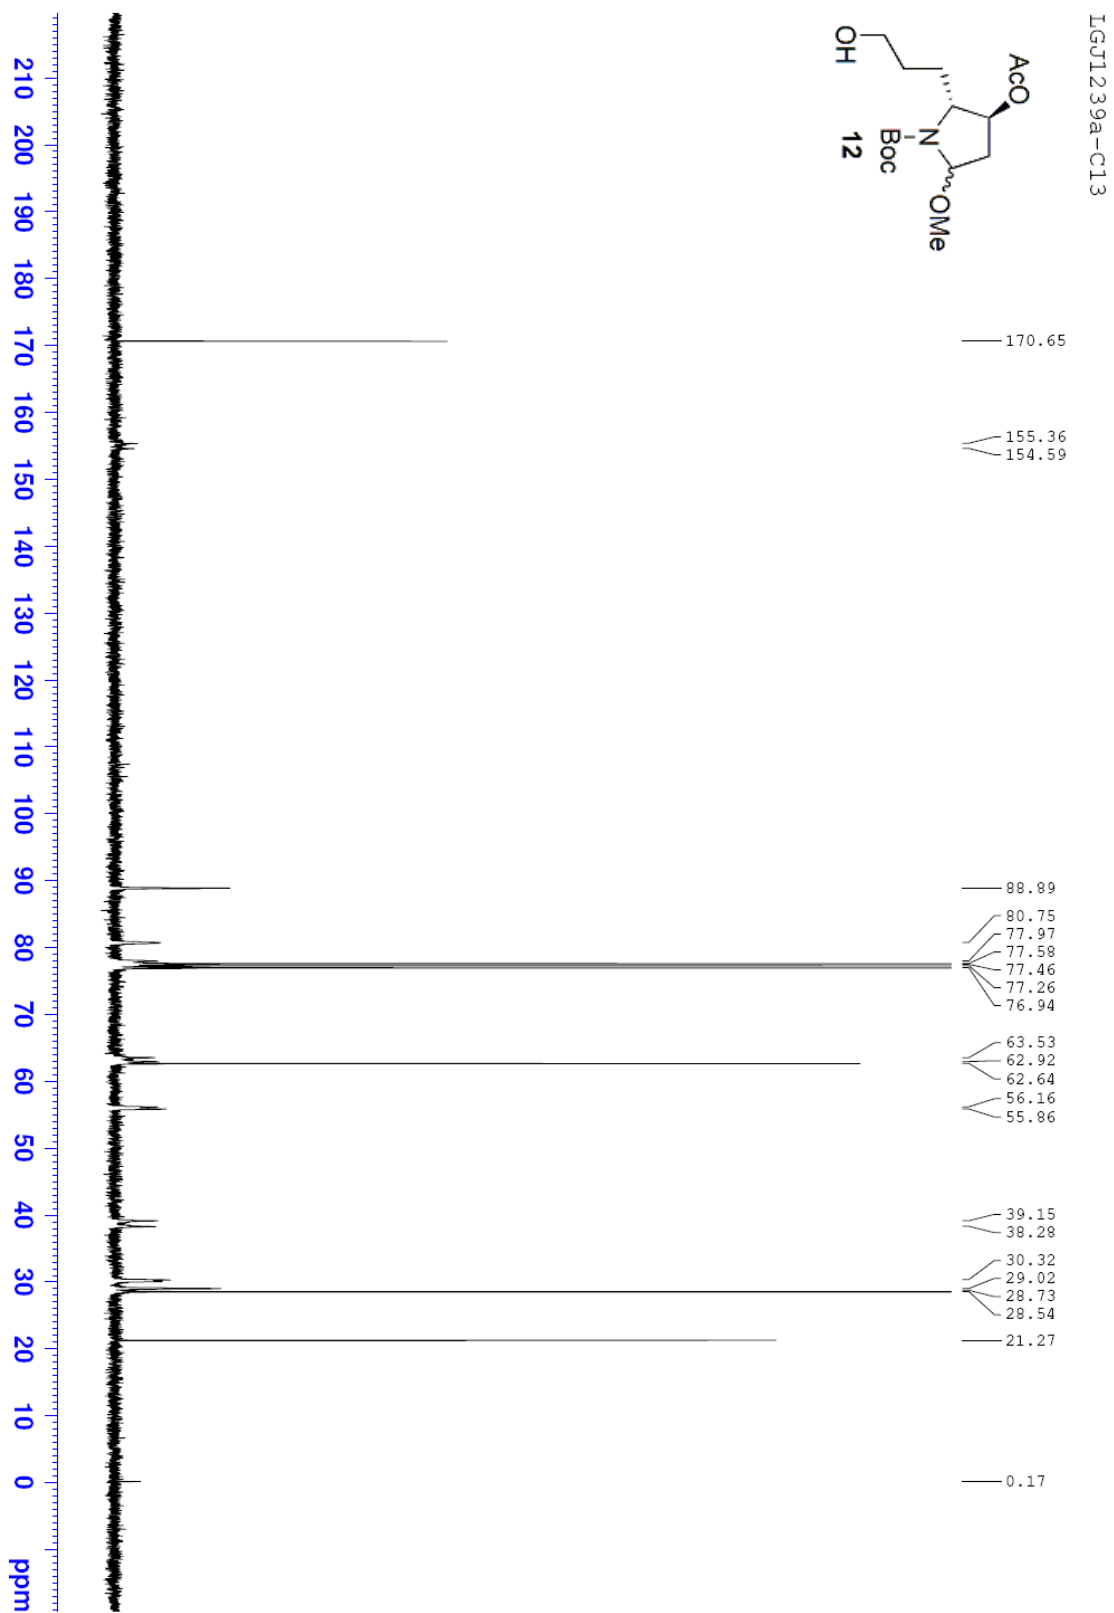

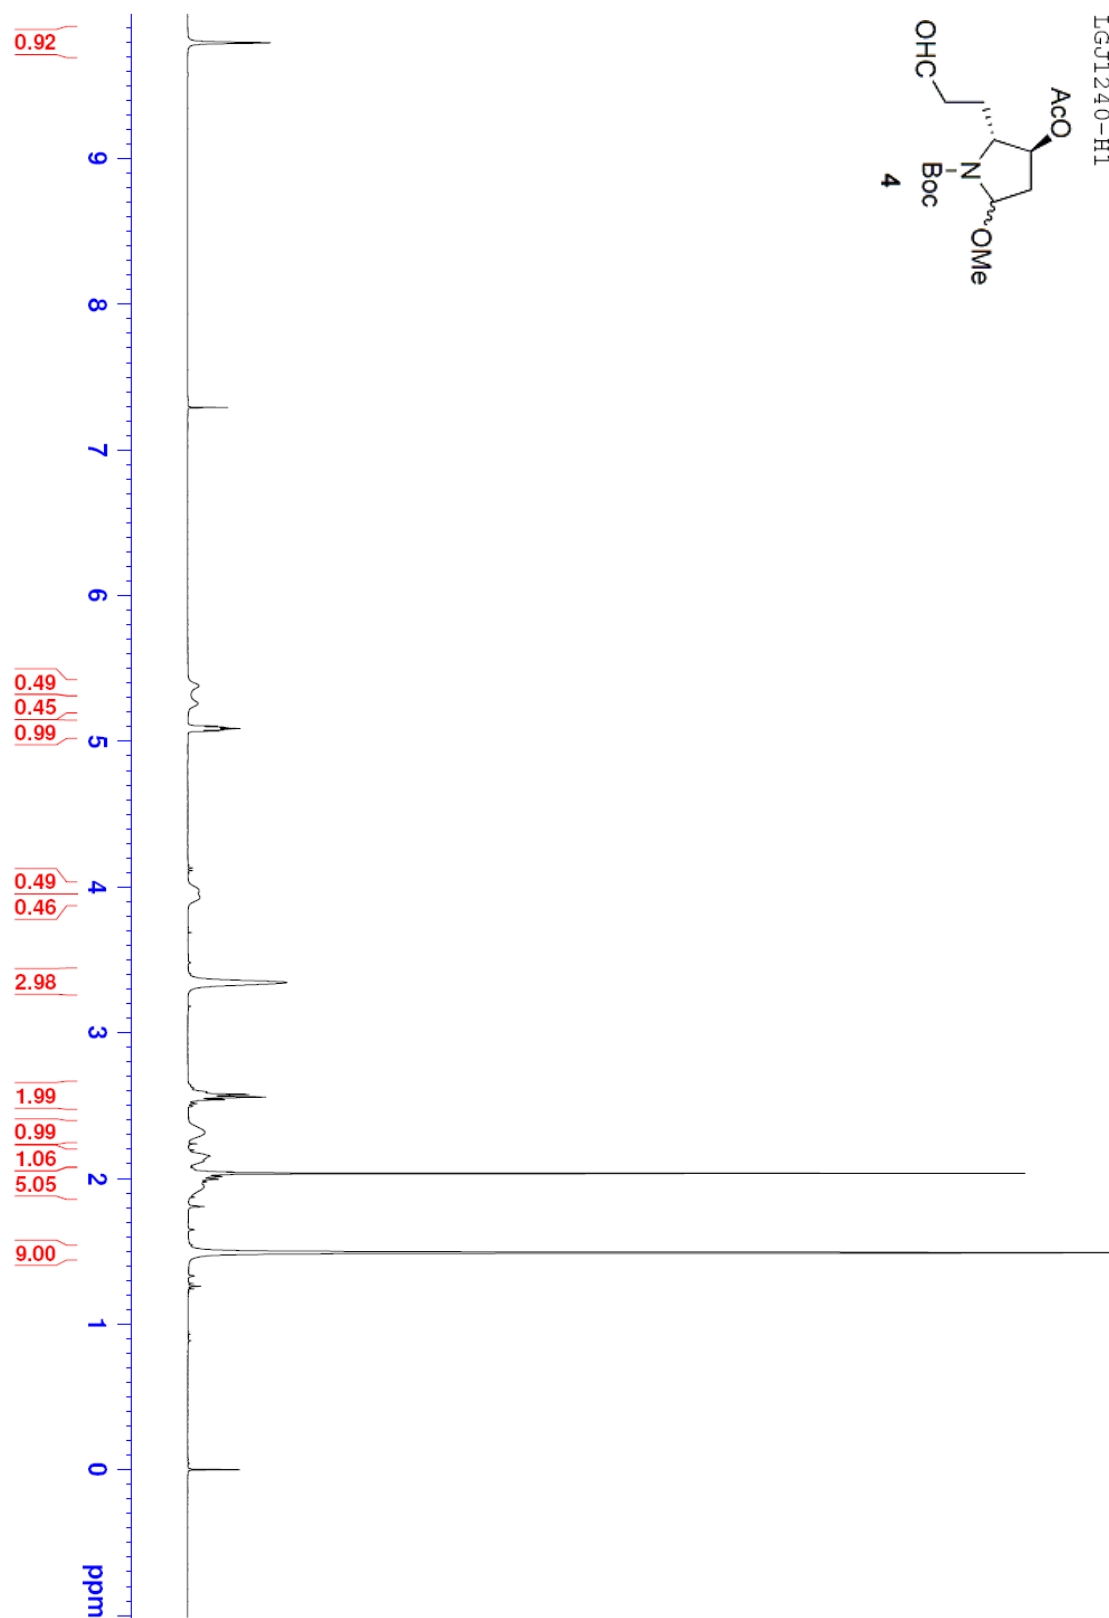

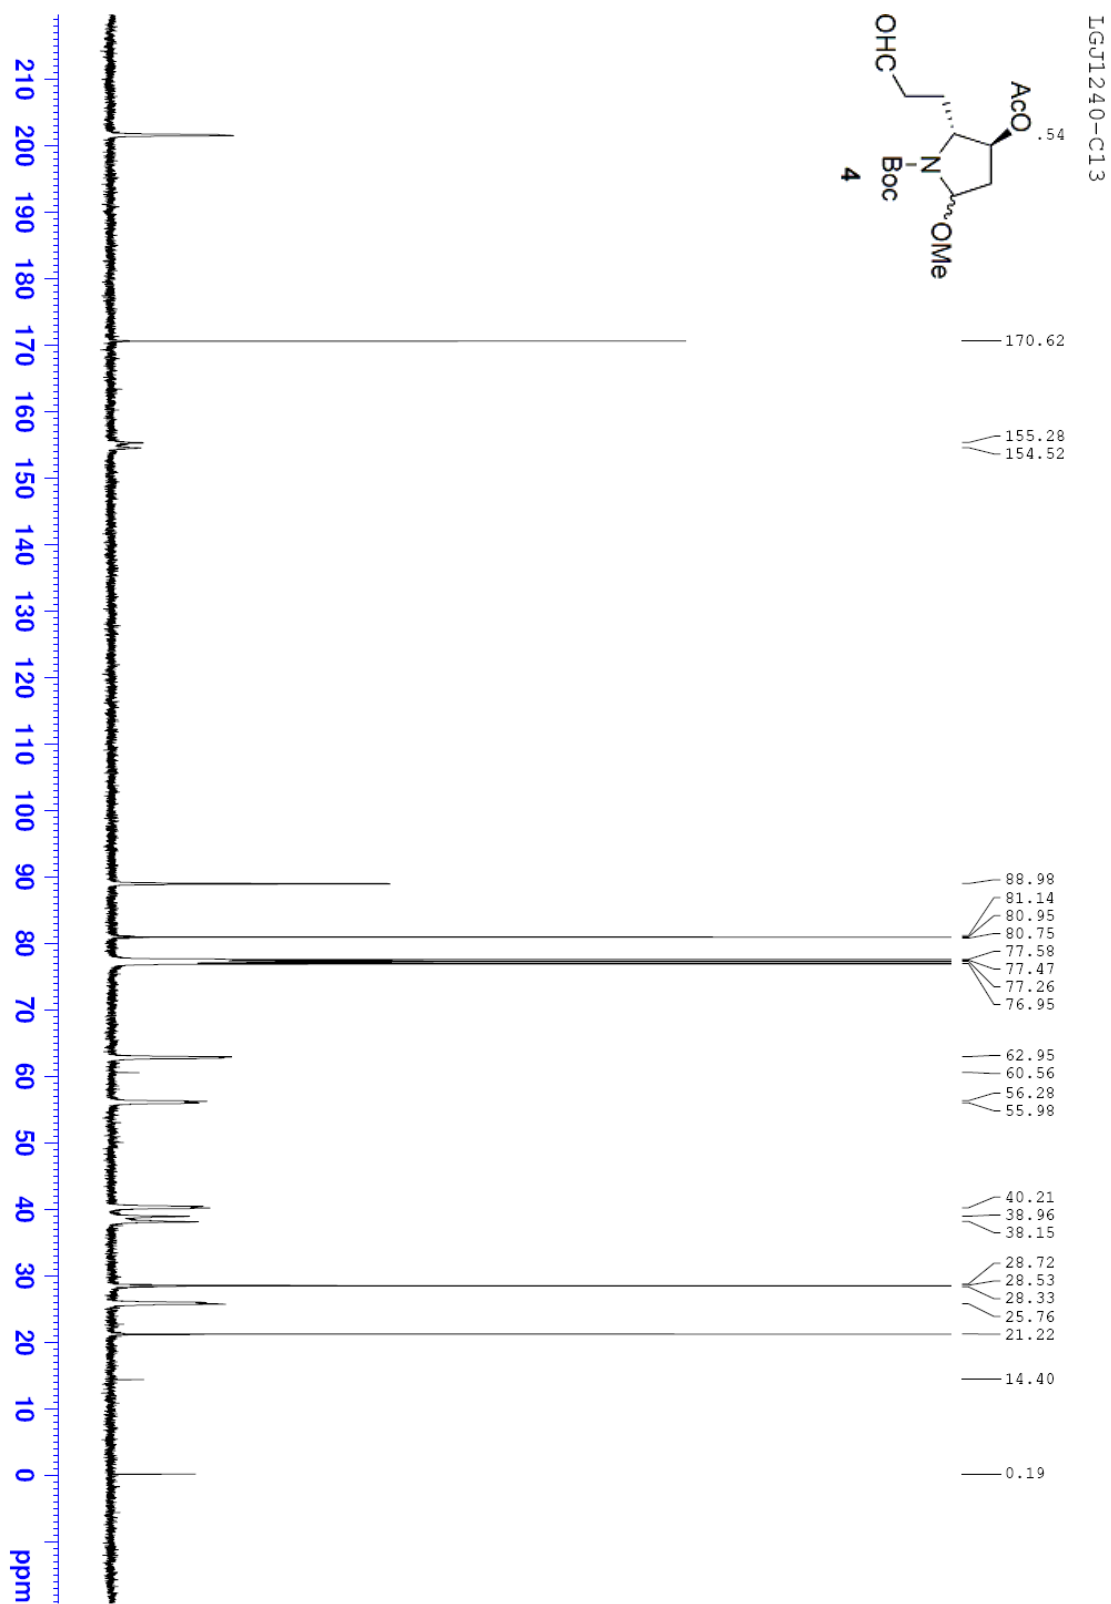

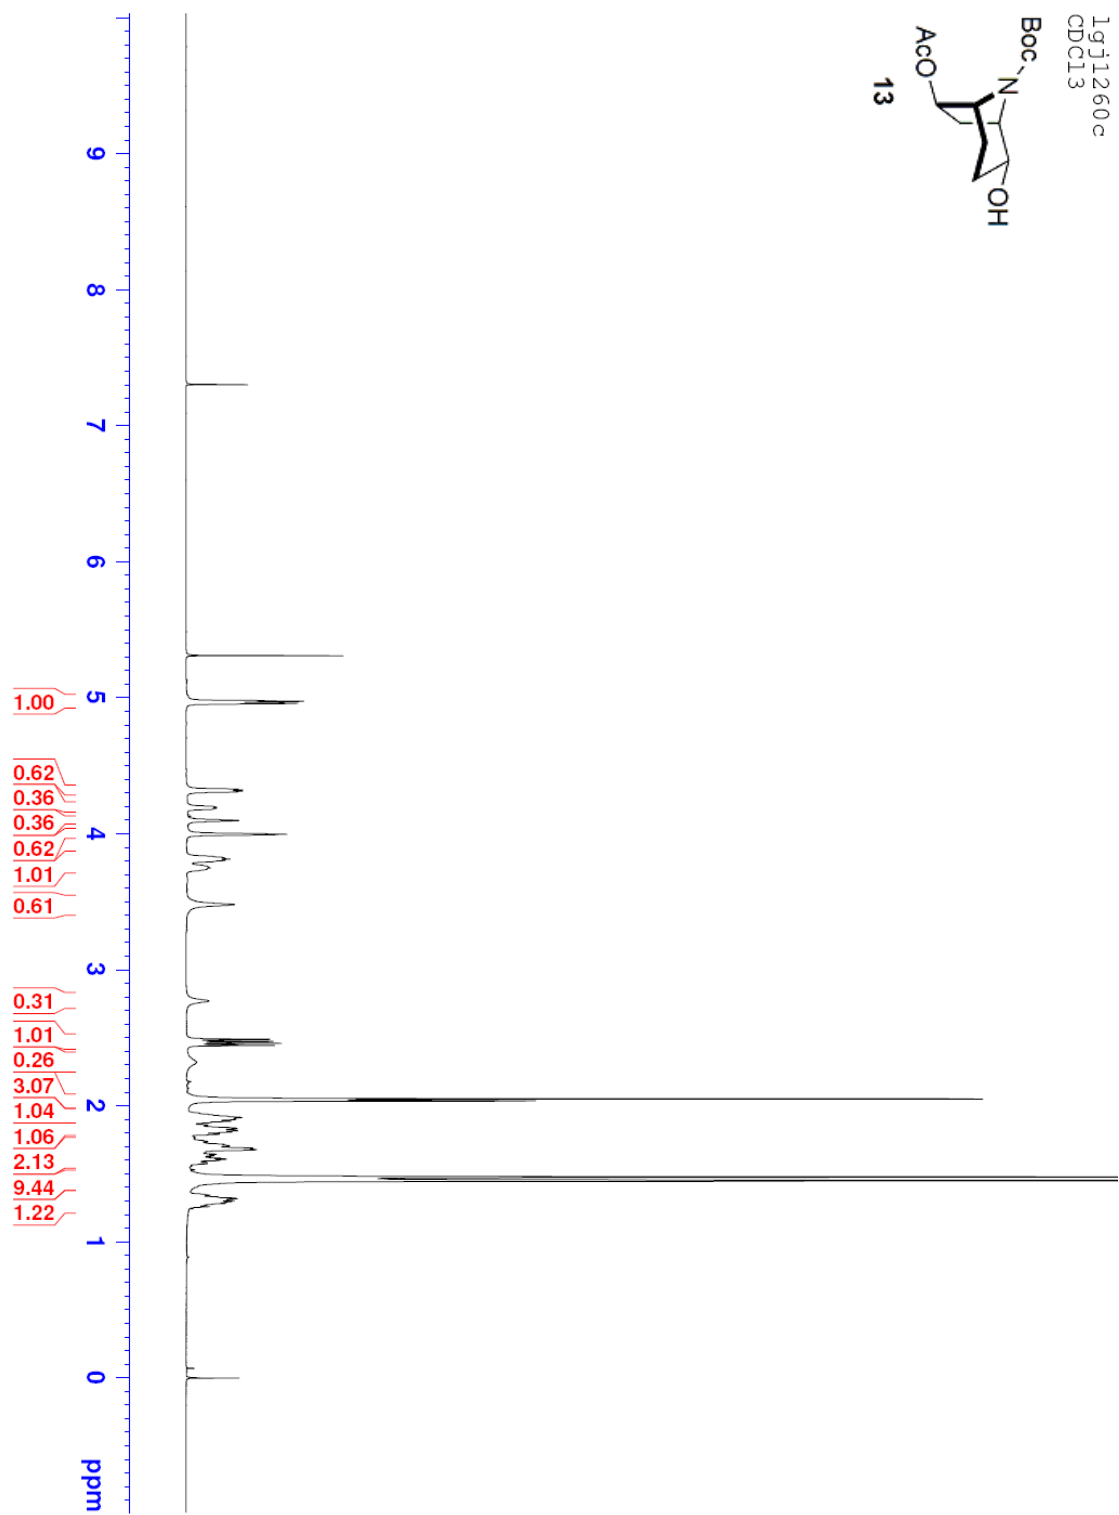

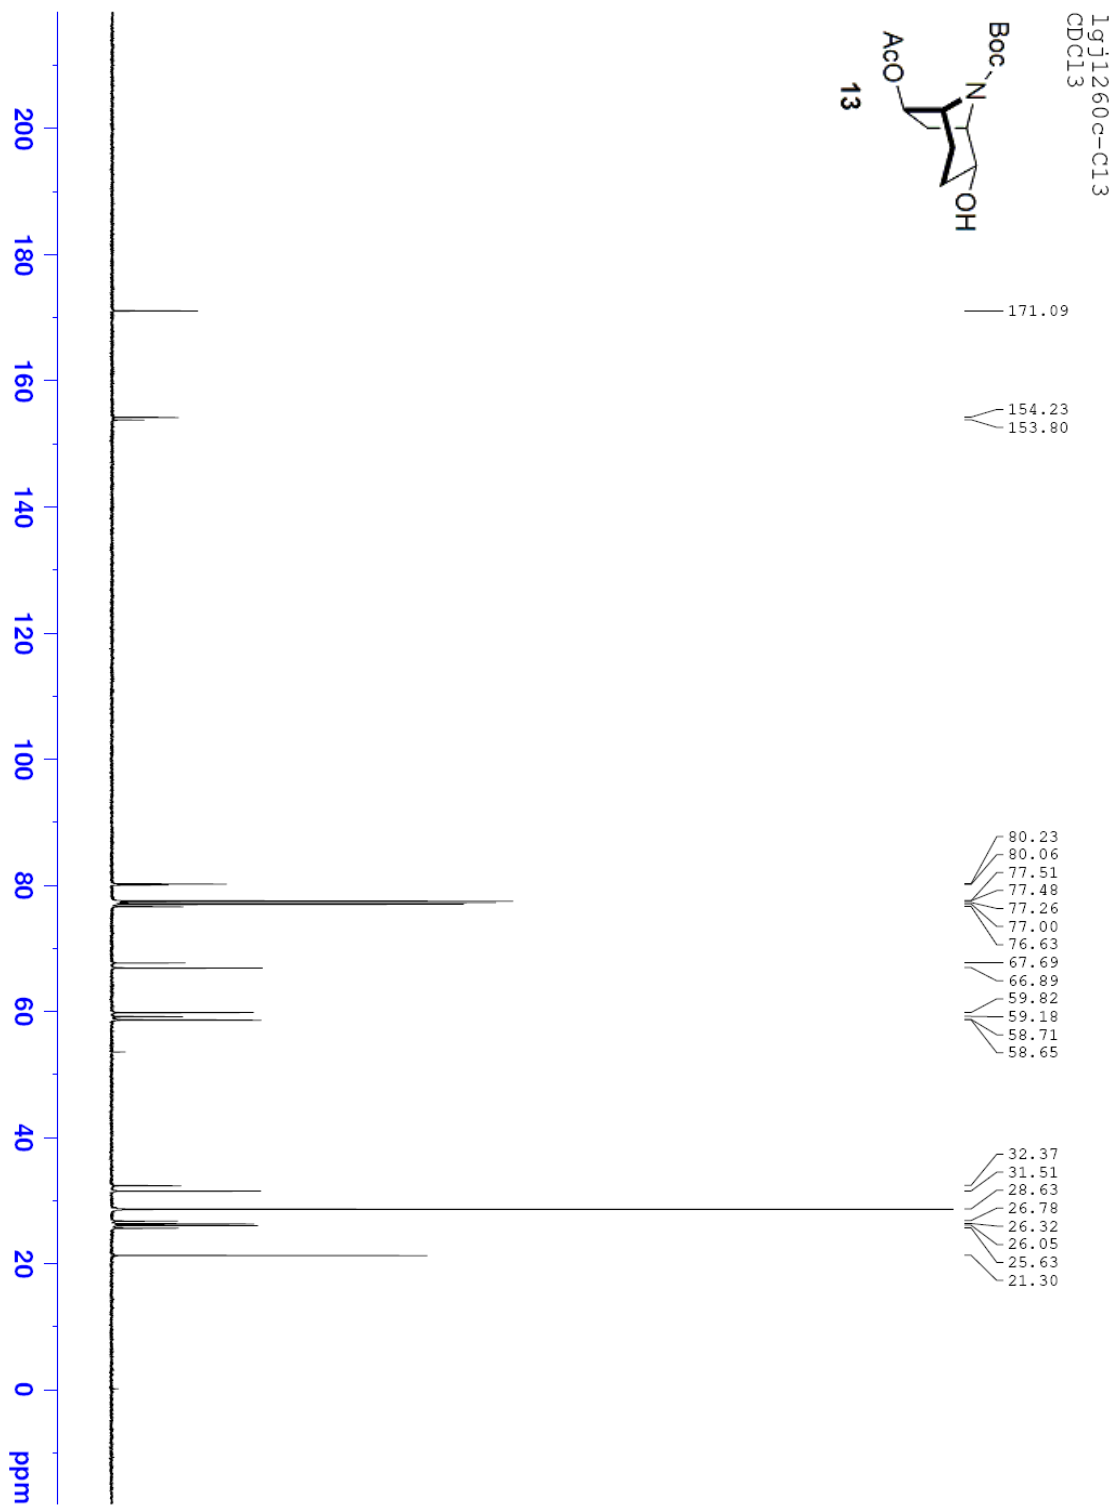

1911276  
CDC13  
20090703

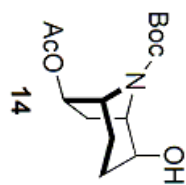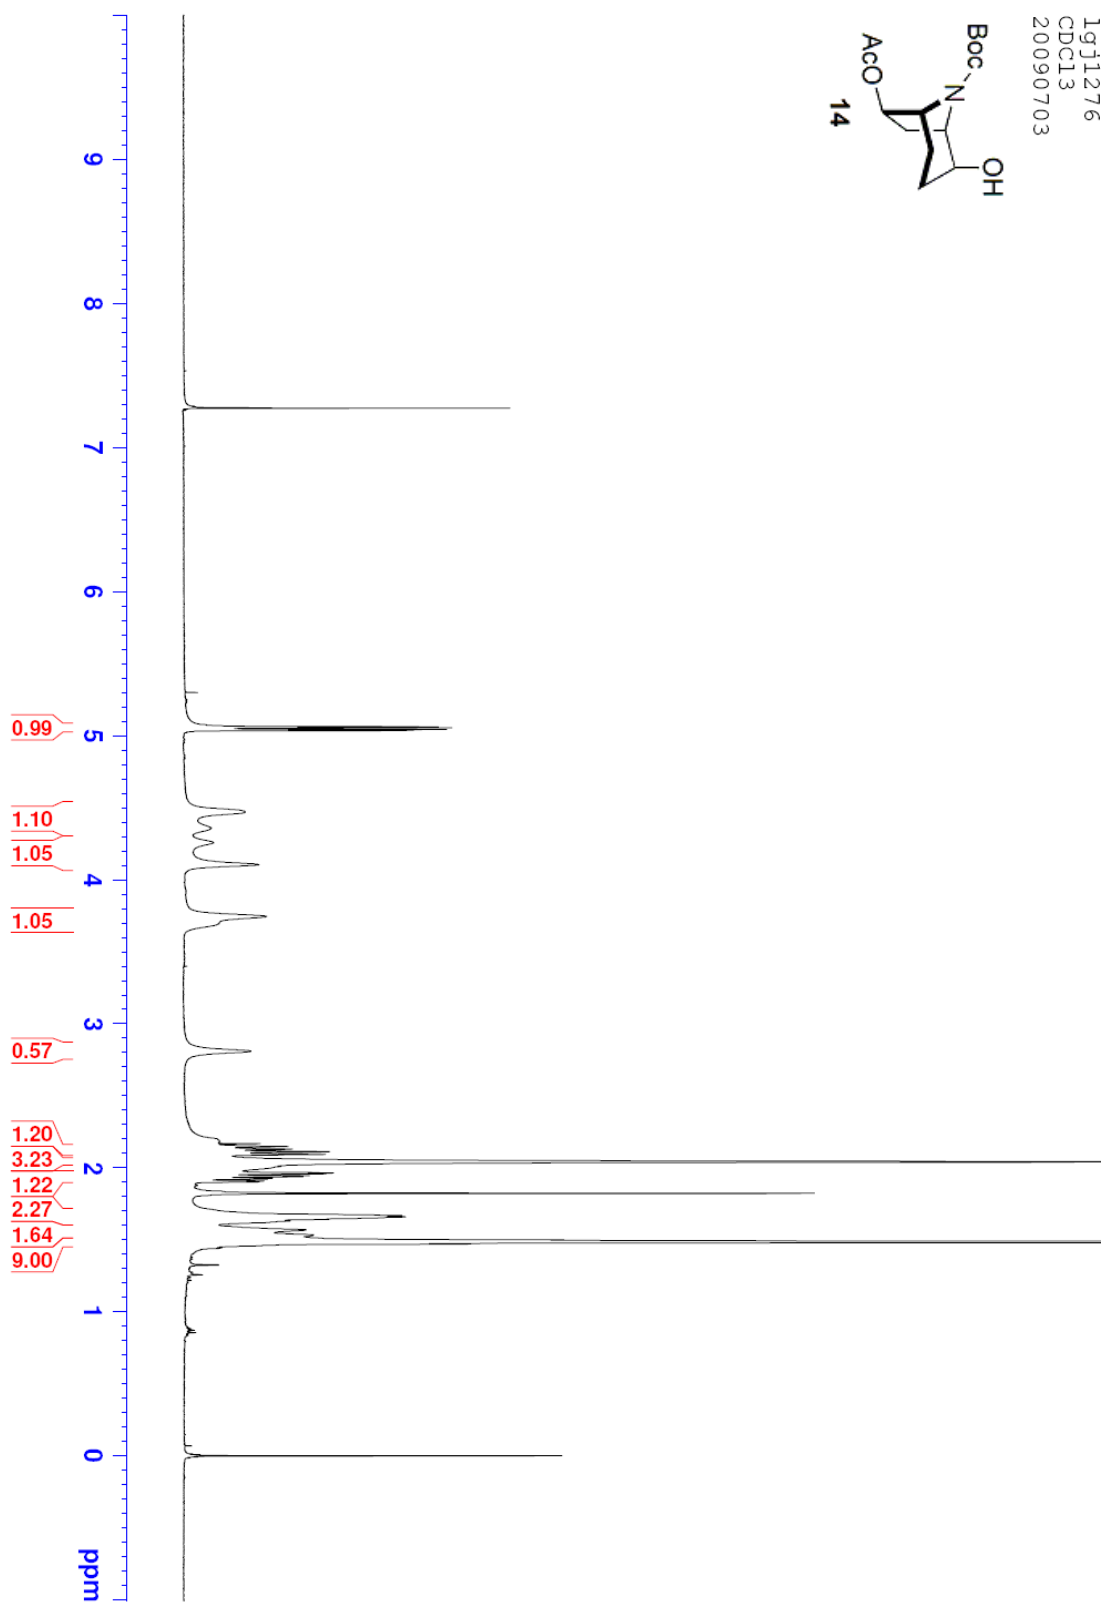

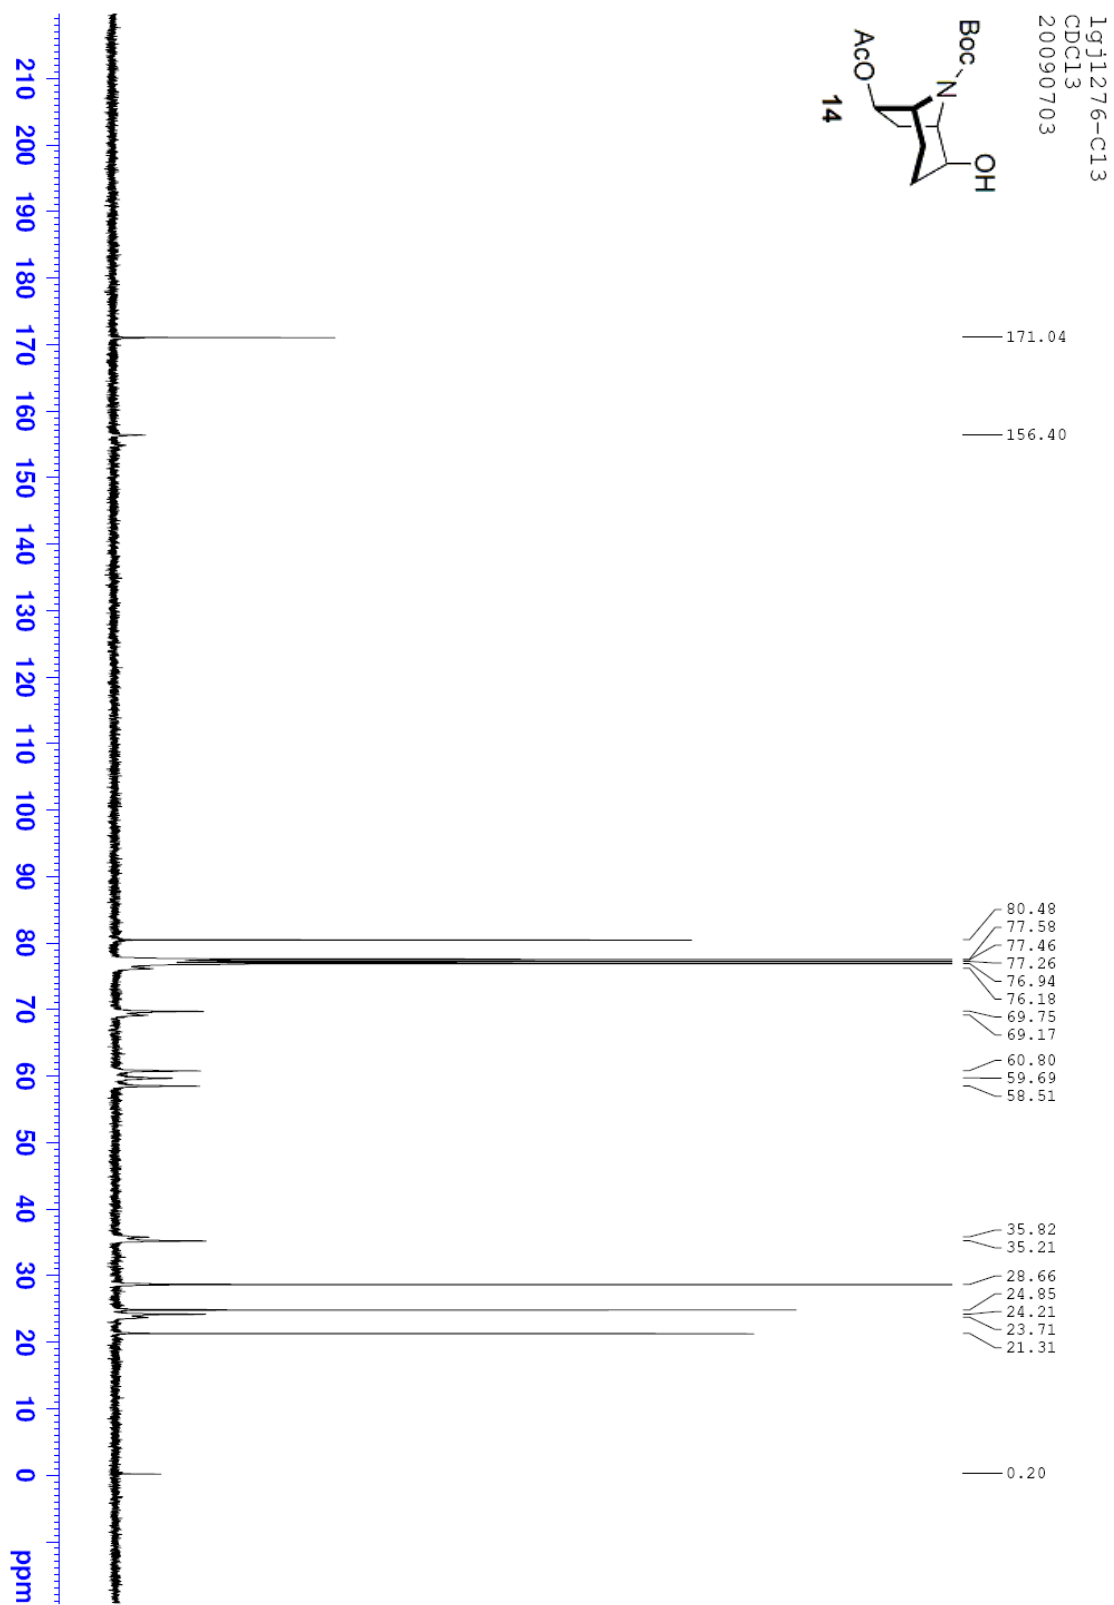



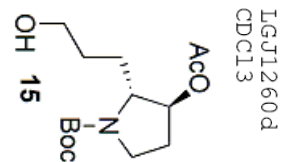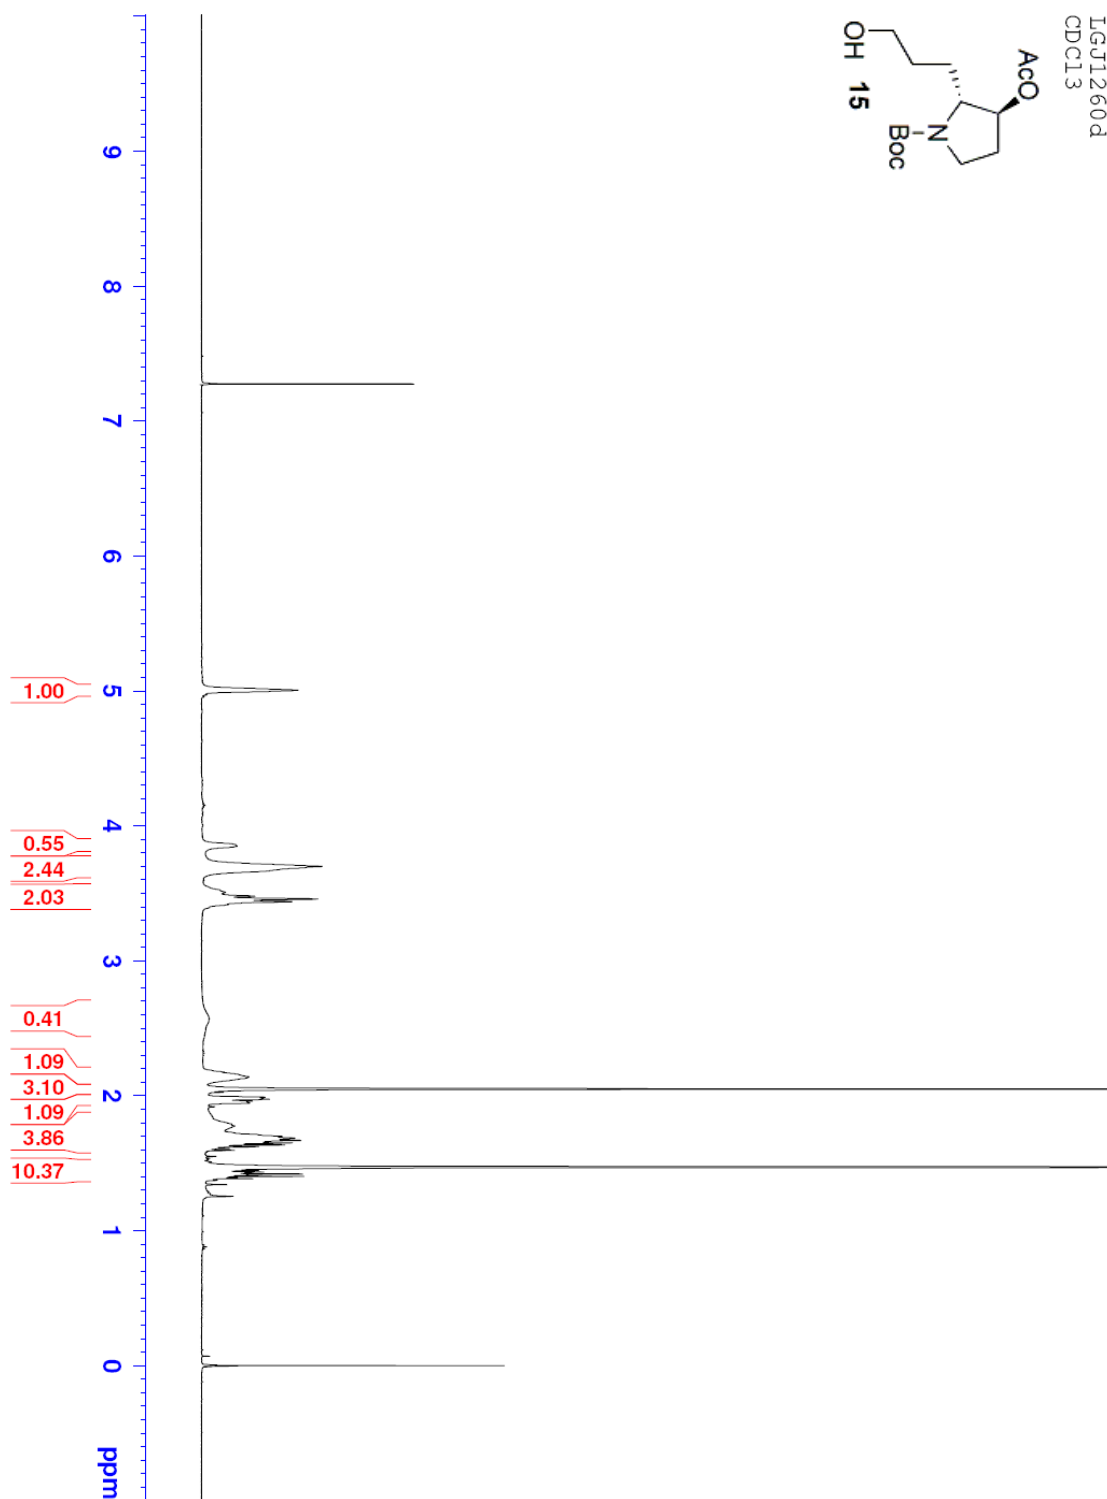

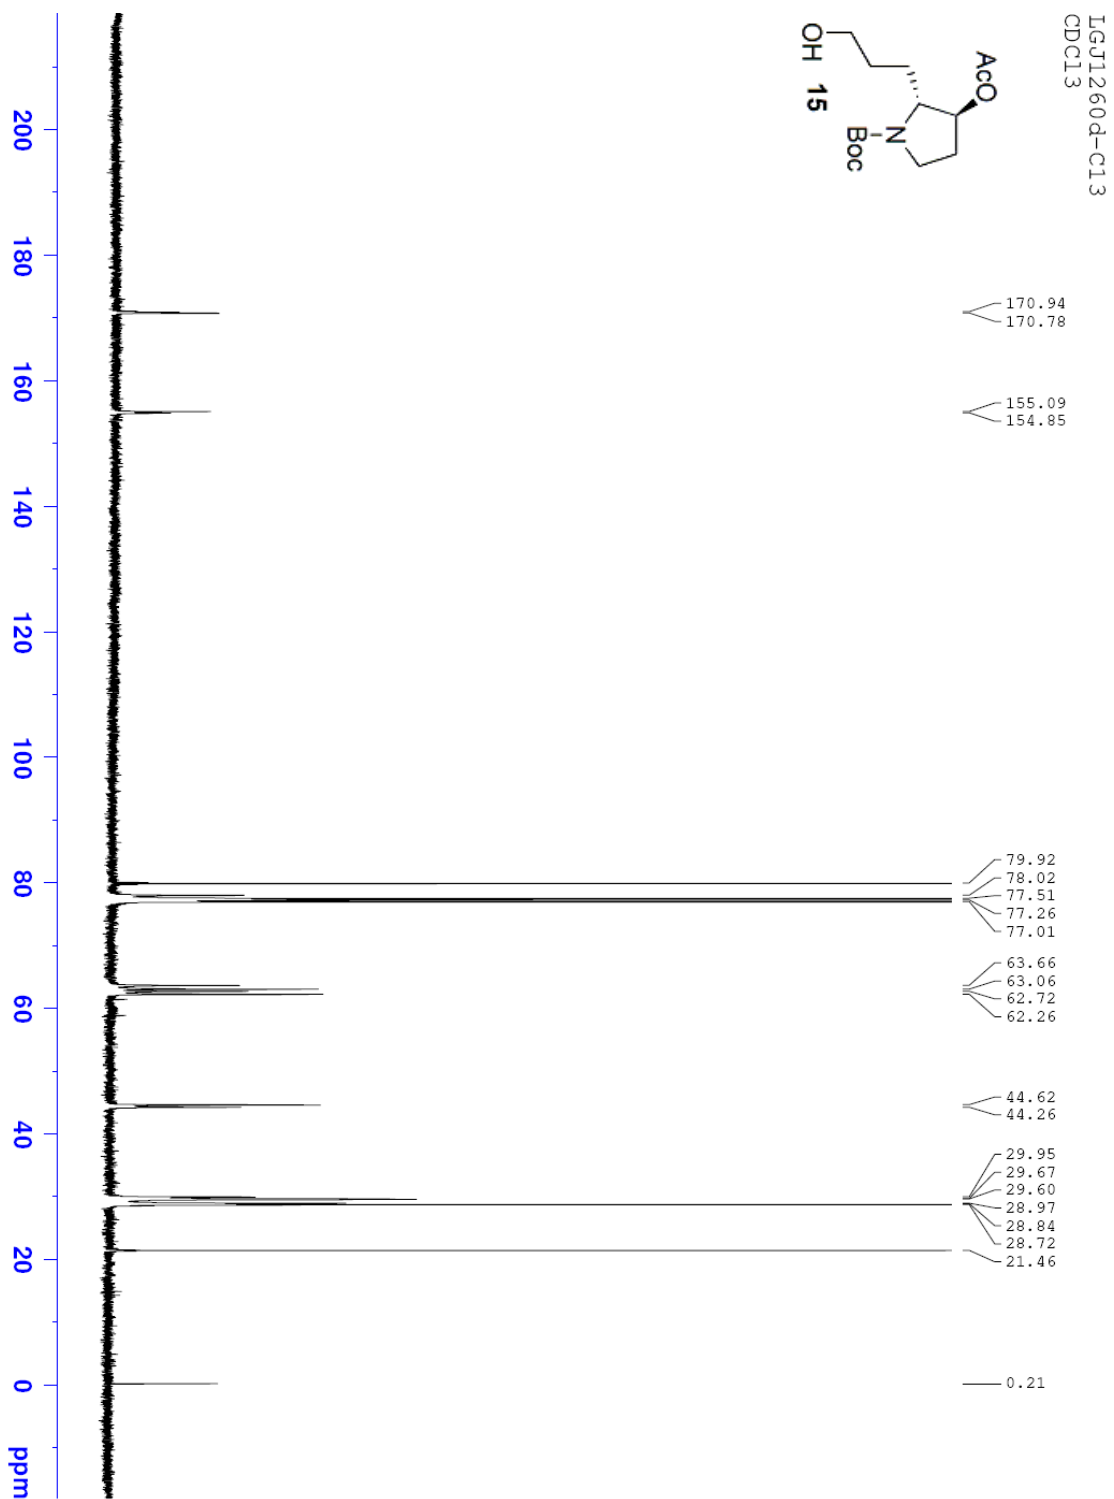

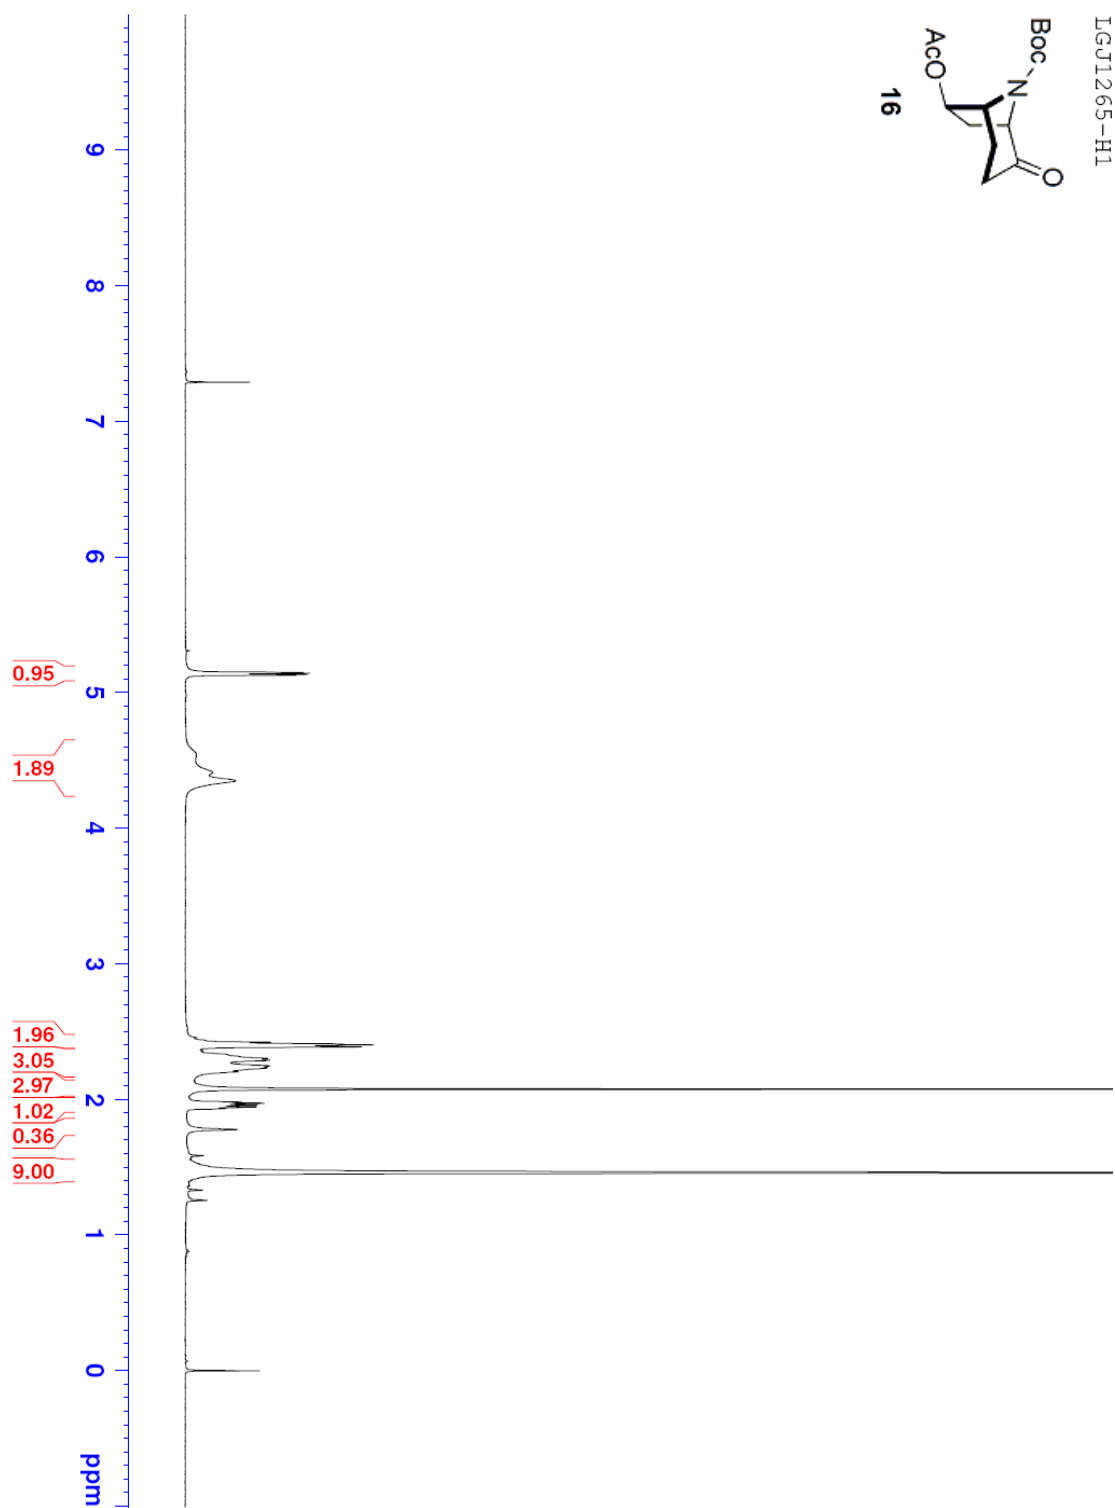

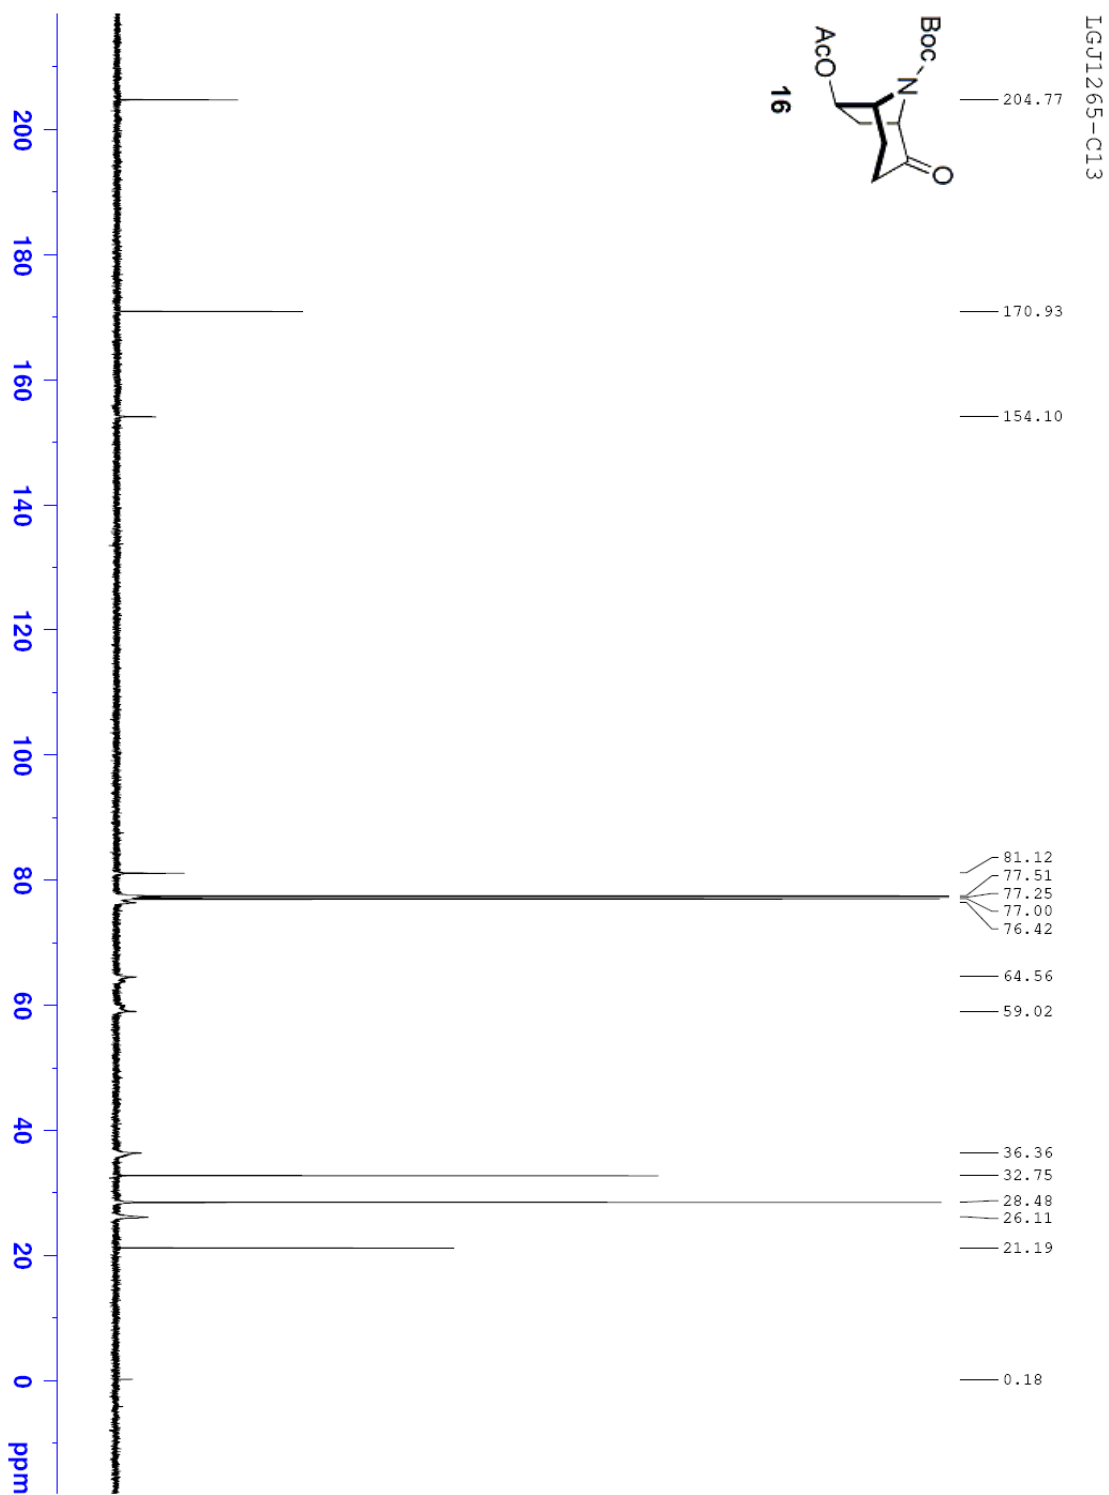

1gJ1279

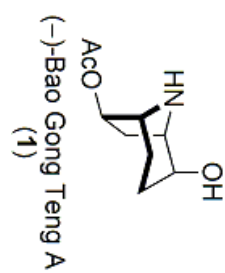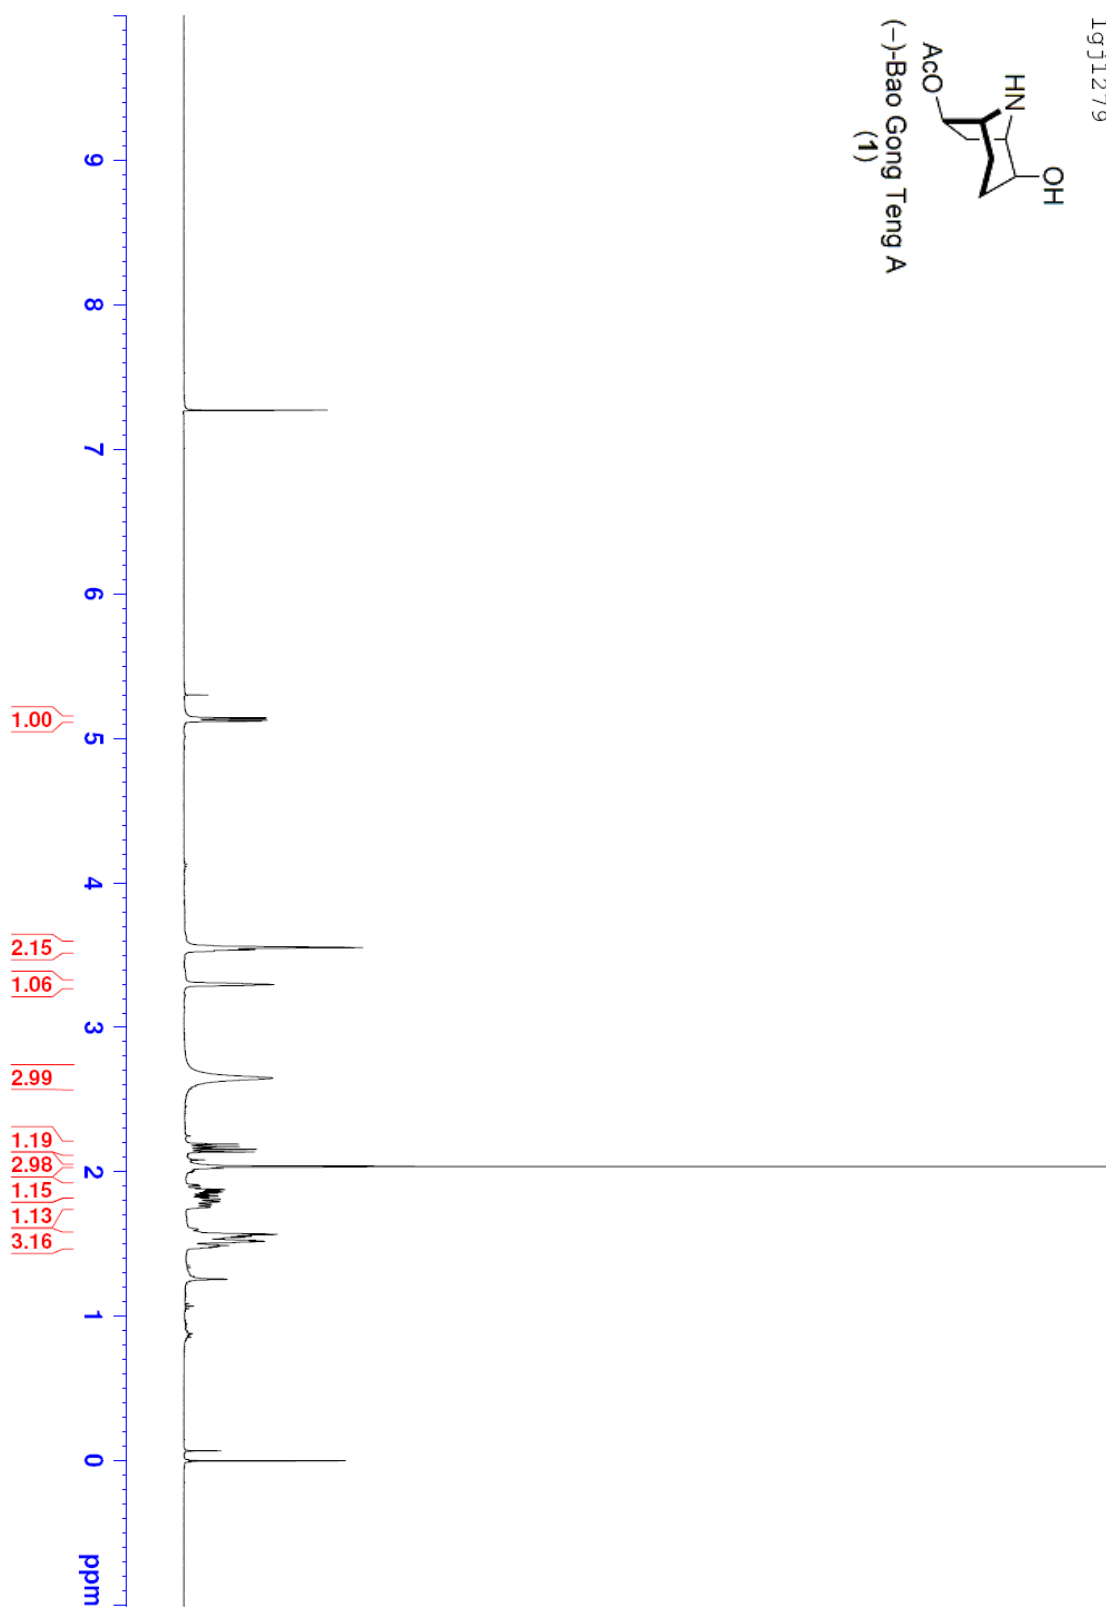

1qj1279c13

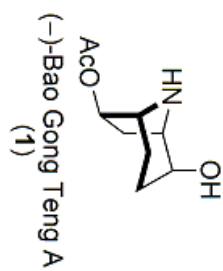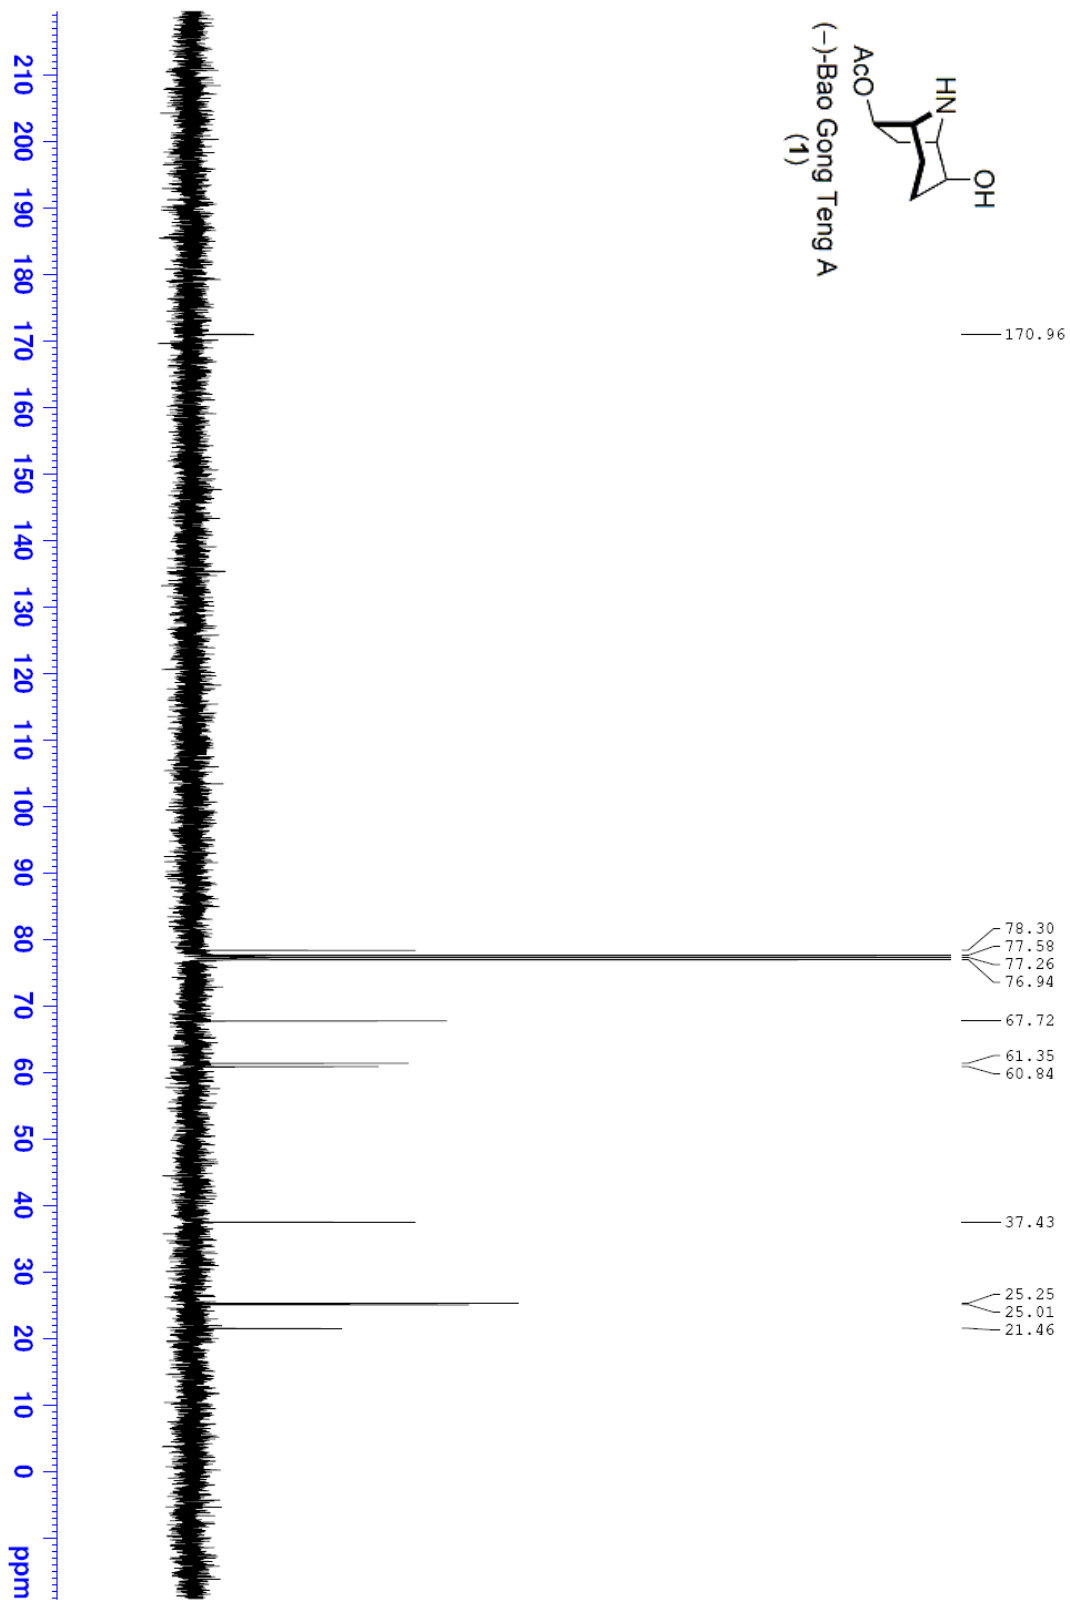

Supplement: c0cc04371k.pdf [file c0cc04371k.pdf]
